# Supplementary material for: GWAS of bone size yields twelve loci that also affect height, BMD, osteoarthritis or fractures
Source: Springer Nature journal article supplement (doi:10.1038/s41467-019-09860-0), 2019-05-03
Supplement: MOESM1 [file 41467_2019_9860_MOESM1_ESM.pdf › 41467_2019_9860_MOESM1_ESM.pdf]

Styrkarsdottir, *et.al.* Supplementary Information:  
GWAS of bone size finds twelve loci that also affect  
height, BMD, osteoarthritis or fractures

# Table of Contents

|                                                                                                                                                                                                                                                                                                                                                                                                                                                                                                                                                        |    |
|--------------------------------------------------------------------------------------------------------------------------------------------------------------------------------------------------------------------------------------------------------------------------------------------------------------------------------------------------------------------------------------------------------------------------------------------------------------------------------------------------------------------------------------------------------|----|
| <b>SUPPLEMENTARY NOTES</b> .....                                                                                                                                                                                                                                                                                                                                                                                                                                                                                                                       | 4  |
| Supplementary Note 1.  MIR196A2 .....                                                                                                                                                                                                                                                                                                                                                                                                                                                                                                                  | 4  |
| Supplementary Note 2.  Hip fractures and DXA area, BMD, and BMC.....                                                                                                                                                                                                                                                                                                                                                                                                                                                                                   | 7  |
| Supplementary Note 3.  arcOGEN consortium investigators.....                                                                                                                                                                                                                                                                                                                                                                                                                                                                                           | 8  |
| Supplementary Note 4.  Acknowledgement .....                                                                                                                                                                                                                                                                                                                                                                                                                                                                                                           | 8  |
| <b>SUPPLEMENTARY FIGURES</b> .....                                                                                                                                                                                                                                                                                                                                                                                                                                                                                                                     | 10 |
| Supplementary Figure 1.  Images of bone areas from DXA scans .....                                                                                                                                                                                                                                                                                                                                                                                                                                                                                     | 10 |
| Supplementary Figure 2.  Locus plots of genome wide significant associations.....                                                                                                                                                                                                                                                                                                                                                                                                                                                                      | 11 |
| Supplementary Figure 3.  Effect of rs11614913 on mir-196-a2 .....                                                                                                                                                                                                                                                                                                                                                                                                                                                                                      | 15 |
| Supplementary Figure 4.  Fraction of genes with predicted miR-196a-5p 3'UTR recognition sites<br>that have experimental support .....                                                                                                                                                                                                                                                                                                                                                                                                                  | 16 |
| Supplementary Figure 5.  The effect of the rs11614913 variant in MIR196A2 on target gene<br>expression in human HEK293 cell line .....                                                                                                                                                                                                                                                                                                                                                                                                                 | 17 |
| Supplementary Figure 6.  Downregulation in MIR196A2 insert cells for genes with predicted 3'UTR<br>recognition sites. ....                                                                                                                                                                                                                                                                                                                                                                                                                             | 18 |
| Supplementary Figure 7.  Gene set enrichment for the entire set of genes suppressed by MIR196A<br>insert. ....                                                                                                                                                                                                                                                                                                                                                                                                                                         | 19 |
| Supplementary Figure 8.  Correlation between rs11614913 and rs371683123 at 12q13.13 and<br>expression of the <i>HOXC8</i> gene in adipose tissue. ....                                                                                                                                                                                                                                                                                                                                                                                                 | 20 |
| Supplementary Figure 9.  Correlation between effects of GIANT height variants on adult height and<br>effects on DXA areas .....                                                                                                                                                                                                                                                                                                                                                                                                                        | 21 |
| Supplementary Figure 10.  Correlation between effects of GEFOS BMD variants on BMD and effects<br>on DXA areas .....                                                                                                                                                                                                                                                                                                                                                                                                                                   | 22 |
| Supplementary Figure 11.  Gating strategy to sort GFP positive HEK293T cells .....                                                                                                                                                                                                                                                                                                                                                                                                                                                                     | 23 |
| <b>Supplementary Tables</b> .....                                                                                                                                                                                                                                                                                                                                                                                                                                                                                                                      | 24 |
| Supplementary Table 1.  Conditional analysis between variants at three loci in the Icelandic<br>discovery dataset: a) between two variants at 15q25.2 at the <i>ADAMTSL3</i> and <i>SH3GL3</i> genes, b)<br>between the two variants at the <i>SOX9</i> locus that associate with intertrochanteric area in the<br>Icelandic discovery dataset and two recently published variants that associate with hip shape<br>measures, and c) between the 4q31.21 Icelandic variant and a recently published variant associated<br>with hip shape measure ..... | 24 |
| Supplementary Table 2.  The number of individuals in all participating studies split by phenotype                                                                                                                                                                                                                                                                                                                                                                                                                                                      | 26 |
| Supplementary Table 3.  Gene function analysis. A) Analysis of gene ontology overrepresentation<br>for the high-confidence miR-196a-5p target genes as carried out in Panther (pantherdb.org);<br>showing results at FDR < 5% ordered according to decreasing level of overrepresentation ratios.<br>B) The seventeen miR-196a-5p target genes listed out with mean expression in HEK293T (inhouse<br>data) and osteoblasts (Fantom5 data).....                                                                                                        | 27 |

|                                                                                                                                                                                                                                                          |           |
|----------------------------------------------------------------------------------------------------------------------------------------------------------------------------------------------------------------------------------------------------------|-----------|
| <b>Supplementary Table 4. Differential expression of miR-196a-5p target genes in pairwise comparisons for gene expression experiments carried out in cells transfected with MIR196A2 C-allele insert, T-allele insert and empty vector control .....</b> | <b>29</b> |
| <b>Supplementary Table 5. Expression correlation between HOXC8 and rs11614913 and rs371683123 before and after conditioning on the other variant .....</b>                                                                                               | <b>32</b> |
| <b>Supplementary Table 6. Association of DXA area markers with vertebral fractures in all sample-sets combined</b>                                                                                                                                       | <b>33</b> |
| <b>Supplementary Table 7. Association of height markers and BMD markers with DXA area measures in Iceland</b>                                                                                                                                            | <b>34</b> |
| <b>Supplementary Table 8. Mendelian Randomization .....</b>                                                                                                                                                                                              | <b>38</b> |
| <b>Supplementary Table 9. Genetic correlations between DXA area, DXA BMD, hip or knee osteoarthritis and hip fractures .....</b>                                                                                                                         | <b>40</b> |
| <b>Supplementary Table 10. Contribution of DXA area, BMC and BMD to the risk of hip fractures, full model</b>                                                                                                                                            | <b>43</b> |
| <b>Supplementary References: .....</b>                                                                                                                                                                                                                   | <b>44</b> |

## SUPPLEMENTARY NOTES

### Supplementary Note 1.      MIR196A2

The mature miRNA (miR) sequence derived from MIR196A2 is excised from the 5' arm of the pre-miR hairpin, then referred to as miR-196a-5p (mirbase.org). This microRNA is tissue-specific and is enriched in chondrocytes and in glycosaminoglycan secreting cells (chondrocytes, tendon cells, fibroblasts) (<http://fantom.gsc.riken.jp>). The rs11614913 variant resides on the 3' arm (Supplementary Fig. 3) and for this reason does not alter the seed sequence. Therefore, the variant is not expected to affect recognition of its target gene mRNAs. However, the T-allele in the mature miR duplex introduces a wobble bond, i.e. pairing between uracil and guanine in RNA, at the 5' end of the 5p-arm (Supplementary Fig. 3). On the basis of this observation, we hypothesized that the effect of the variant might lie in efficiency, rather than specificity, of target gene repression due to either 1) differences in thermodynamic stability of the mature miR duplex by genotype thereby leading to effects on incorporation of the mature 5p strand into Ago complex <sup>1</sup> or 2) effects of the genotype on miR processing to the mature miR duplex form <sup>2,3</sup>, as previously proposed <sup>4</sup>, which could affect the abundance of the mature miR duplex. In both cases, we expect the variant to have a general effect on transcription levels across genes targeted for repression by miR-196a-5p.

In order to assess the impact of the rs11614913 variant in MIR196A2 on target gene expression, we carried out an experiment in which we transfected HEK293T cells with over-expression plasmids containing 1) *MIR196A2* with the C-allele, 2) *MIR196A2* with the T-allele and 3) no insert (empty plasmid). In order to avoid biases introduced by variation in transfection efficiency between cell cultures, we carried out cell sorting by flow cytometry for cells marked by GFP protein expression from plasmid DNA. After cell sorting we isolated RNA and carried out RNA-seq (polyA+) to assess genome-wide transcript expression levels. The experiments were independently done in six replicates for each condition (n=18).

The RNA-seq transcript expression was quantified with Kallisto <sup>5</sup> making use of Ensembl transcript sequences (version 87) as a reference transcriptome. Gene expression was computed by aggregating expression across transcripts. We then used DESeq2 for Bioconductor in R to analyse differential expression <sup>6</sup>. In principle, the biological interpretation of differentially expressed genes in our set up can be seen as 1) primary effects and 2) secondary effects. Here, the primary effects are the direct target genes of mir-196a2 whereas the secondary effects include downstream effects caused by downregulation of the target genes, e.g. downregulation of transcription factors (TFs) by miR-196a2 can lead to downstream changes in gene expression. In order to study the genotype effects on the primary target genes, we sought to define a group of high-confidence miR-196a-5p target genes. We

downloaded a list of 302 predicted target genes (TargetScan 7.2) and we find that target genes with high conservation scores ( $P_{CT}$ ; Probability of conserved targeting), defined in TargetScan 7.2, are more likely to have experimental support (genes identified as plausible direct targets of miR-196a-5p; according to Tarbase V8<sup>7</sup>) as compared with those with low conservation score (Supplementary Fig. 4). In particular, the fraction of genes containing a 3'UTR recognition site, predicted by TargetScan v7.2, with experimental support in Tarbase starts to become particularly high at  $P_{CT} > 0.86$  (Supplementary Fig. 4). On the basis of this observation, we defined our high confidence miR-196a-5p target genes as genes with *in silico* predicted 3'UTR recognition site for miR-196a-5p where the  $P_{CT}$  score is  $> 0.86$ ; resulting in a list of seventeen genes. This  $P_{CT}$  score translates into less than 14% probability for the miR-196a-5p binding sites in the target genes being conserved by chance. The biological relevance of these genes to human variation in bone morphology is seen in that the seventeen target genes are significantly enriched for functional roles involved in skeletal system development (13.5 fold overrepresentation;  $P$ -value=2.36e-5), see Supplementary Table 11. Fourteen of the high-confidence miR-196a-5p target genes are expressed in the MIR196A2 transfected HEK293T cells.

To further assess the validity of the defined list of miR-196a-5p target genes, we find that these genes are highly enriched among the set of genes found significantly downregulated in cells with MIR196A2 insert (C- or T-alleles) *versus* empty controls (Supplementary Fig. 5A and B). Specifically, 13 (92.9%) and 12 (85.7%) out of the fourteen expressed target genes are in the group of significantly downregulated genes ( $P_{adj} < 0.05$ ) in C- and T-allele transfected cells, respectively. In contrast, without thresholding the  $P_{CT}$  conservation score, the intersection with downregulated genes is considerably lower, i.e. 50% and 40.4% in C- and T-allele transfected cells, respectively. Supplementary Fig. 6 shows the mean and standard deviation in log2 fold-change values (derived from the MIR195A2 insert versus control comparison) across genes containing *in silico* predicted 3'UTR recognition sites for miR-196a-5p (TargetScan v7.2) at varying  $P_{CT}$  score thresholding level. None of the target genes were significantly upregulated.

When comparing MIR196A2 C-allele versus T-allele transfected cells, we observe that all of the fourteen target genes are more down-regulated in C-allele transfected cells (Students's t-test  $P = 0.00016$ ) (Supplementary Fig. 5C); although this effect is clearly subtle as reflected in 1) low effect size log2 fold values and 2) that none of the genes tested individually remain statistically significant after adjusting for multiple testing. Log2 fold change values calculated using the method implemented in DESeq2 v1.16.1 (Bioconductor for R). We also carried out a permutation based test to determine significance; we counted how often the observed difference was lower than the differences derived from permutations of samples agnostic to the allele annotation;  $\binom{12}{6} = 924$  possible unique permutations. This analysis demonstrates a significant difference in downregulation of the target genes between the two

transfected cells types ( $P = 0.042$ ) showing that the rs11614913[T] allele is less effective, when compared with the C-allele, in repressing expression of miR-196a-5p target genes.

Finally, in order to gain insight into the biological effects of miR-196a2, we carried out a gene set enrichment analysis for functional categories in the comparison between MIR196A2 insert (C- or T-allele) and empty vector controls. This analysis was carried out using fgsea in Bioconductor for R using gene ontology (GO) terms derived from MSigDB v6.2<sup>ref8</sup> using log2 fold-change values as the gene ranking parameter. The top significant functional category ( $P$ -adjusted  $< 0.05$ ) involves downregulation of genes involved in energy metabolism (e.g. GO terms oxidative phosphorylation and electron transport chain). Also, a functional category relevant to biological processes in bone morphology was found to be enriched (GO term embryonic skeletal system morphogenesis). By looking at the leading edge genes for the embryonic skeletal system morphogenesis category in this analysis, i.e. genes in this category with large effect sizes for downregulation, we note that 7 out of these 21 genes have experimental support as direct target genes of miR-196a-5p. Thus, many of the genes driving the enrichment for this functional category are likely primary targets of miR-196a-5p, but others are not; wheather these are downstream effects caused by miR-196a-5p remains to be fully established.

## Supplementary Note 2. Hip fractures and DXA area, BMD, and BMC

We performed a multivariable logistic regression for hip fractures, using age, height and sex adjusted measurements of DXA area, BMD and BMC of lumbar spine, as well as area and BMD of femoral neck, intertrochanteric and trochanteric and BMC of the total hip as explanatory variables. Each of these 10 phenotypes showed independent association with hip fractures, adjusting for the other 9 phenotypes, according to likelihood ratio test (Supplementary Table 17).

Furthermore, five of the loci associated with bone area were also nominally associated with hip fractures ( $p < 0.05$ ). The figure below shows the estimated effect sizes, with 95% confidence intervals, of each of these five variants for the phenotypes listed above. There it can be seen that all of these variants also show significant association with several BMD or BMC measurements so we are not able to see whether the increased risk of fractures is due to bone area rather than BMD or BMC.

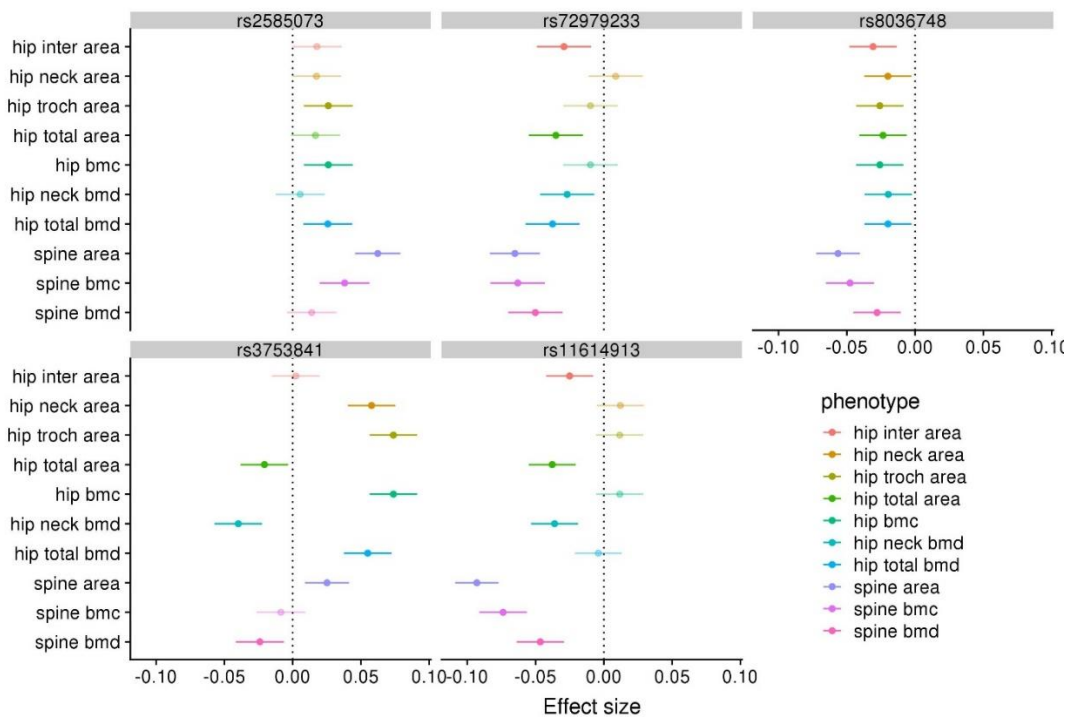

### **Supplementary Note 3. arcOGEN consortium investigators**

John Loughlin (Newcastle University), Nigel Arden (University of Oxford and University of Southampton), Fraser Birrell (Newcastle University), Andrew Carr (University of Oxford), Kay Chapman (University of Oxford), Panos Deloukas (William Harvey Research Institute), Michael Doherty (University of Nottingham), Andrew McCaskie (University of Cambridge), William E. Ollier (University of Manchester), Ashok Rai (University of Worcester), Stuart H. Ralston (University of Edinburgh), Tim D. Spector (King's College London), Ana M. Valdes (University of Nottingham), Gillian A. Wallis (University of Manchester), J. Mark Wilkinson (University of Sheffield), Eleftheria Zeggini (Wellcome Trust Sanger Institute)

### **Supplementary Note 4. Acknowledgement**

We thank the subjects of the Icelandic deCODE study, the Danish PERF study, the Swedish MDC study, the Dutch Rotterdam study, the UK arcOGEN and UK Biobank studies, the Australian Dubbo study, the Chinese Hong Kong Mr OS and Ms OS studies, the Korean AMC study and the Vietnamese Osteoporosis Study.

We thank the staff at deCODE genetics core facilities and the staff at the Research Service Center for their important contribution to this work, and Hjalti Sigurdarson for the artwork.

A part of this research has been conducted using the UK Biobank Resource under Application Number 23359.

The Rotterdam Study is funded by Erasmus Medical Center and Erasmus University, Rotterdam, Netherlands Organization for the Health Research and Development (ZonMw), the Research Institute for Diseases in the Elderly (RIDE), the Ministry of Education, Culture and Science, the Ministry for Health, Welfare and Sports, the European Commission (DG XII), and the Municipality of Rotterdam. The authors are grateful to the study participants, the staff from the Rotterdam Study and the participating general practitioners and pharmacists. The generation and management of GWAS genotype data for the Rotterdam Study (RS I, RS II, RS III) was executed by the Human Genotyping Facility of the Genetic Laboratory of the Department of Internal Medicine, Erasmus MC, Rotterdam, The Netherlands. The GWAS datasets are supported by the Netherlands Organisation of Scientific Research NWO Investments (nr. 175.010.2005.011, 911-03-012), the Genetic Laboratory of the Department of Internal Medicine, Erasmus MC, the Research Institute for Diseases in the Elderly (014-93-015; RIDE2), the Netherlands Genomics Initiative (NGI)/Netherlands Organisation for Scientific Research (NWO) Netherlands Consortium for Healthy Aging (NCHA), project nr. 050-060-810. F.R and K.T are supported by the Netherlands Scientific Organization (NWO) and ZonMW Project number: NW O/ZONMW-VIDI-0 16-136-367. We thank Pascal Arp, Mila Jhamai, Marijn Verkerk, Lizbeth Herrera and Marjolein Peters, MSc, and



Carolina Medina-Gomez, MSc, for their help in creating the GWAS database, and Karol Estrada, PhD, Yurii Aulchenko, PhD, and Carolina Medina-Gomez, MSc, for the creation and analysis of imputed data

arcOGEN: arcOGEN (<http://www.arcogen.org.uk/>) was funded by a special purpose grant from Arthritis Research UK (grant 18030).

UKHLS: These data are from Understanding Society: The UK Household Longitudinal Study, which is led by the Institute for Social and Economic Research at the University of Essex and funded by the Economic and Social Research Council. The data were collected by NatCen and the genome wide scan data were analysed by the Wellcome Trust Sanger Institute. The Understanding Society DAC have an application system for genetics data and all use of the data should be approved by them. The application form is at: <https://www.understandingsociety.ac.uk/about/health/data>.

LSL received support from the Swedish Research Council and the Medical faculty of Lund University.

JL received support from Arthritis Research UK (grant 20771), and from The Medical Research Council and Arthritis Research UK as part of the MRC-Arthritis Research UK Centre for Integrated Research into Musculoskeletal Ageing (CIMA, grants JXR 10641 and MR/P020941/1).

For the Dubbo study: The Dubbo Osteoporosis Epidemiology Study was supported by the Australian National Health and Medical Research Council, Grant Number APP1031494 (CIA T. Nguyen). We gratefully acknowledge the assistance of Sr Janet Watters, Donna Reeves, Shaye Field and Jodie Martin for the interview, data collection and measurement bone mineral density. We also appreciate the invaluable help of the staff of Dubbo Base Hospital.

For VOS: The Vietnam Osteoporosis Study was funded by the Foundation for Science and Technology Development of Ton Duc Thang University (FOSTECT, <http://fostect.tdt.edu.vn>), Grant number FOSTECT.2014.BR.09, and a grant from the Department of Science and Technology of Ho Chi Minh City. We sincerely thank Mrs Tran Thi Ngoc Trang and Fr Pham Ba Lam for coordinating the recruitment of participants. We also thank doctors and medical students of the Pham Ngoc Thach University of Medicine for the data collection and clinical measurements.

J.W. and N.T. have been supported by CUHK VC discretionary fund and The Hong Kong Jockey Club Charities Trust. JSWL received support from Health and Medical Research Fund #12133811.

J-M. K. was supported by grant from the Korea Health Technology R&D Project, Ministry of Health and Welfare, Republic of Korea (Projects HI15C2792).

## SUPPLEMENTARY FIGURES.

Supplementary Figure 1. Images of bone areas from DXA scans

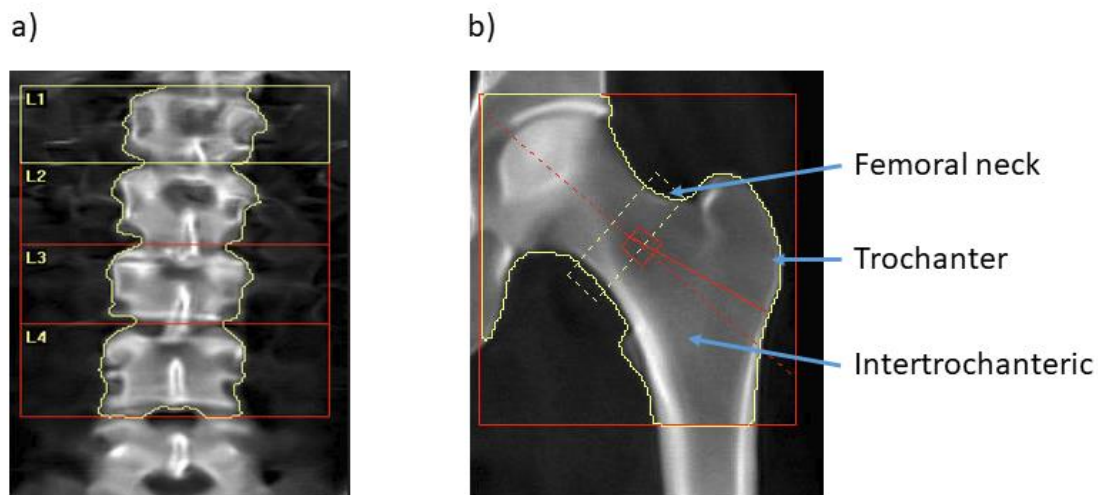

**a)** Spine vertebrae L1 – L4. **b)** Hip area, showing the femoral neck (within the yellow box), trochanter (defined by the yellow outline, the red solid line and femoral neck line) and intertrochanteric (defined by the red solid line, the femoral neck line and the yellow outline) regions. Total hip area is the sum of femoral neck, trochanter and intertrochanteric areas and does not include the femoral head. The red broken line represent the symmetry axis.

The images are from <http://www.hologic.com/horizon-dxa-system-image-gallery>

*P* values ( $-\log_{10}$ ) of SNP associations with the respective phenotypes in the Icelandic discovery samples are plotted against their chromosomal positions (NCBI Build 38 coordinates). SNPs are colored to reflect their linkage disequilibrium (LD) with the marker that was genotyped in the replication samples, in most cases this is the top marker, however, at some loci a functional single-variant genotyping assay could not be made for the top marker and, therefore, a proxy SNP was used. The blue line indicates recombination rates, based on the Icelandic recombination map for males and females combined, with the peaks indicating recombination hotspots. Known genes in the region are shown underneath the plot. The plots were created using a stand-alone version of LocusZoom software <sup>9</sup>. Source data are provided as a Source Data file.

e) Spine area (L1-L4) 15q25.2

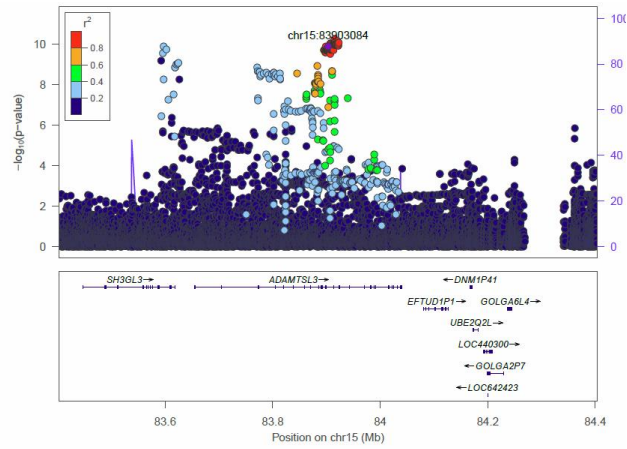

h) Spine area (L1-L4) 11q13.4

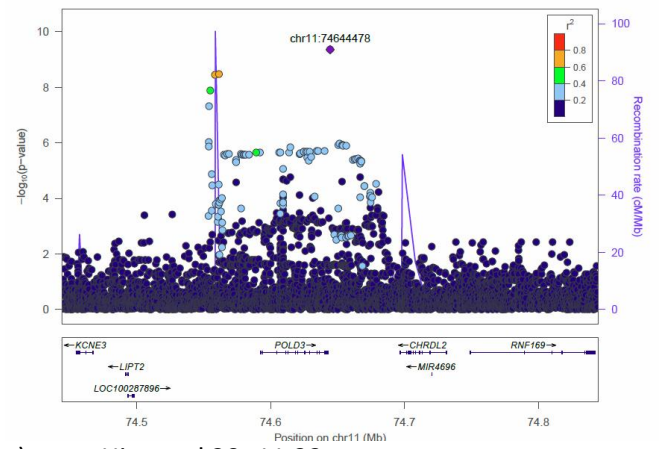

f) Spine area (L1-L4) 15q25.2\_2

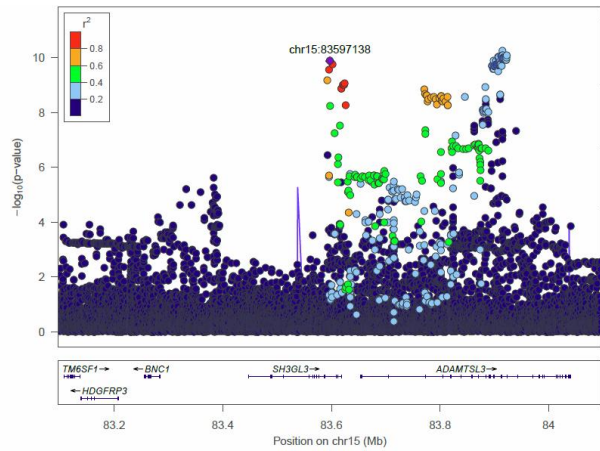

x) Hip total 20q11.22

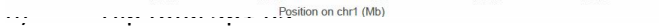

i) Hip total 20q11.22

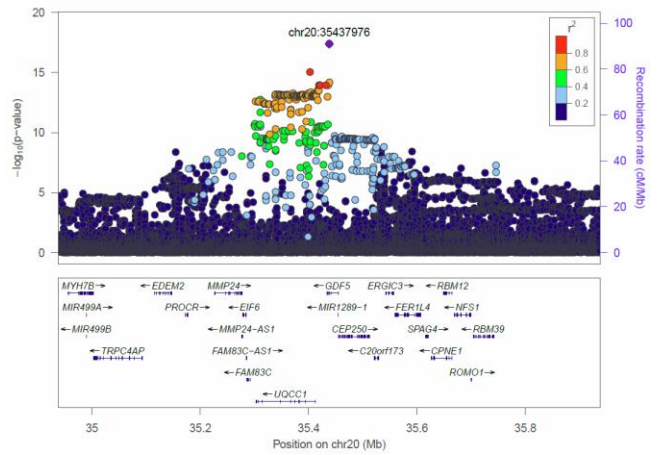

g) Spine area (L1-L4) 6q14.1

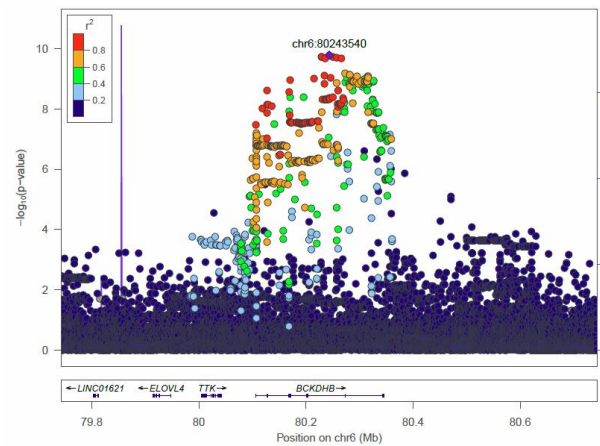

j) Hip total 1p21.1

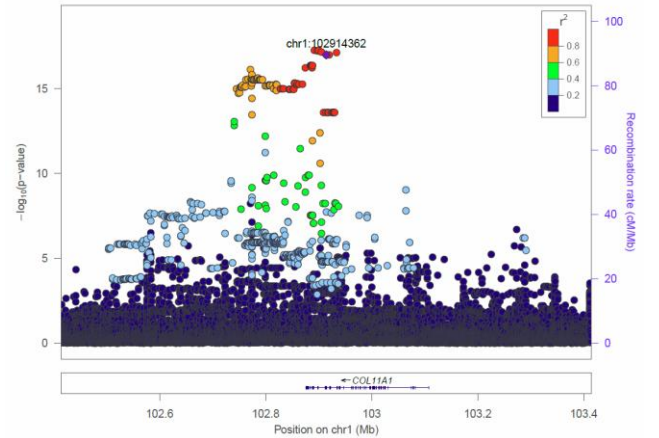

k) Hip total 3p14.3

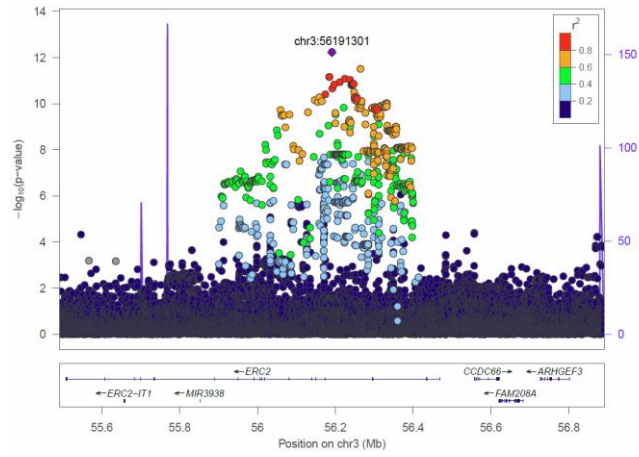

n) Hip femoral neck 4q31.21

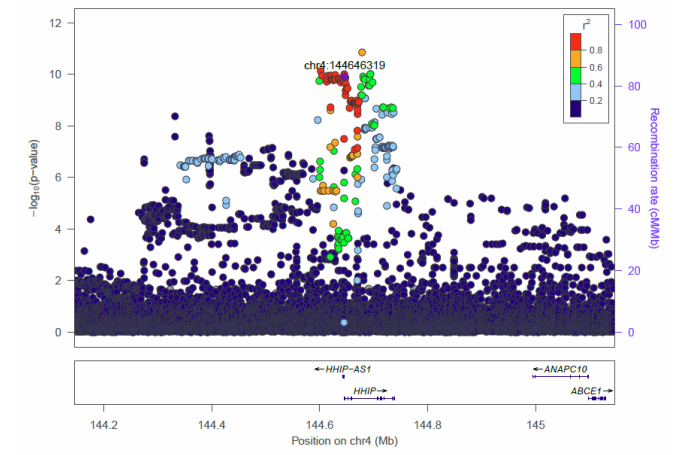

l) Hip total 18q23

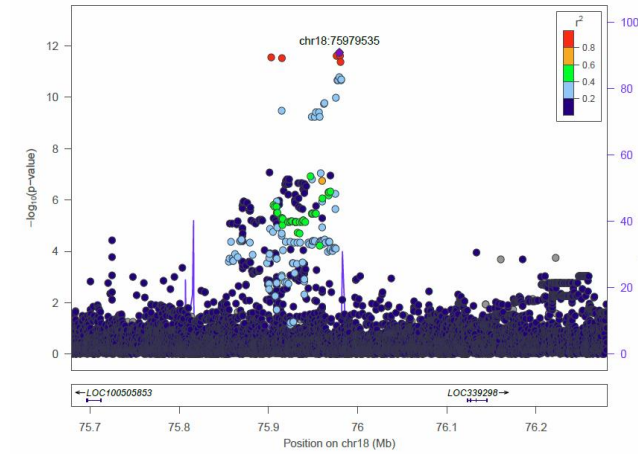

o) Hip intertrochanter area 17q24.3

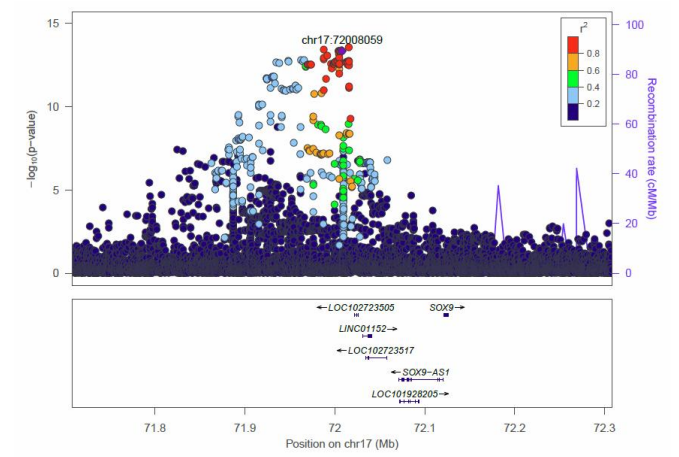

m) Hip total 17q23

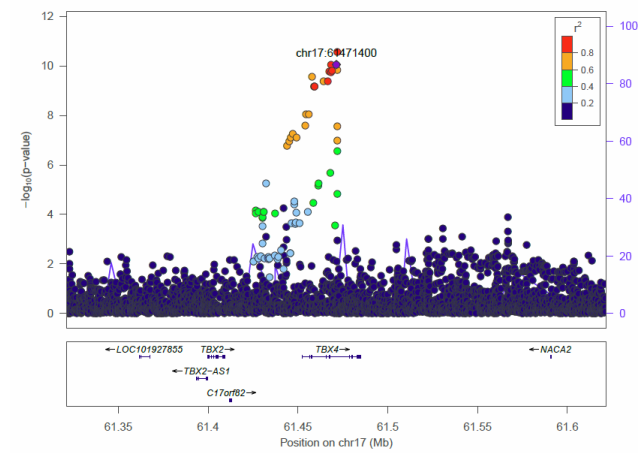

p) Hip intertrochanter area 17q24.3\_2

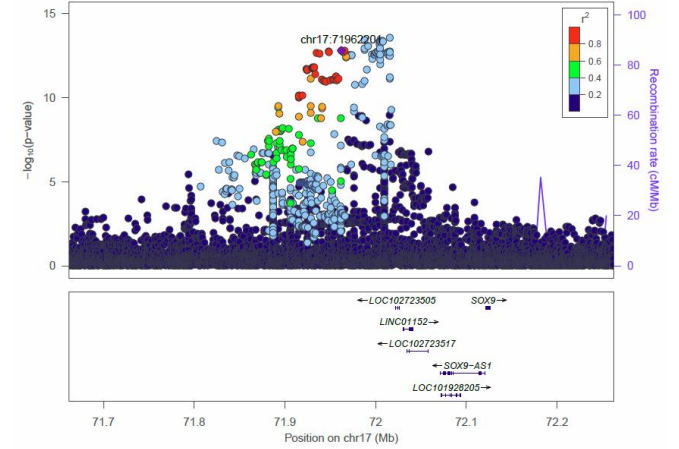



q) Hip intertrochanter area 1p21.1

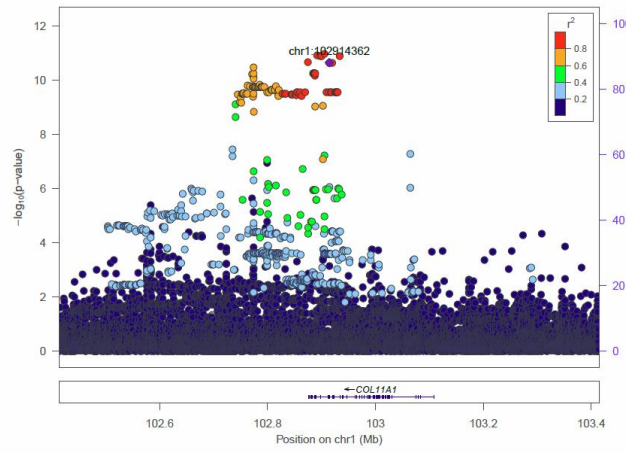

t) Hip trochanter area 1p21

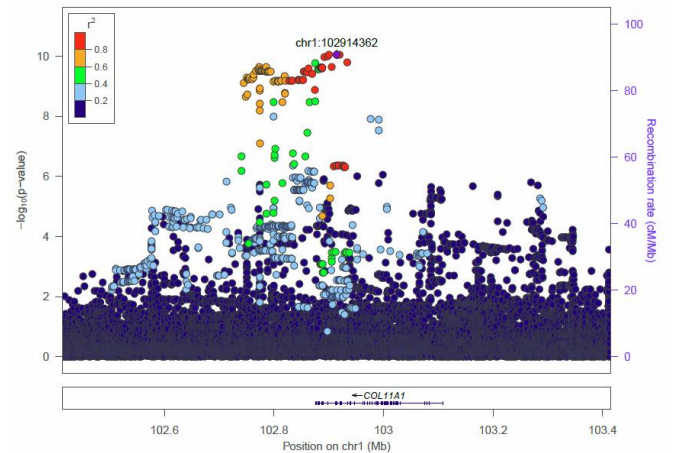

r) Hip intertrochanter area 3p14.3

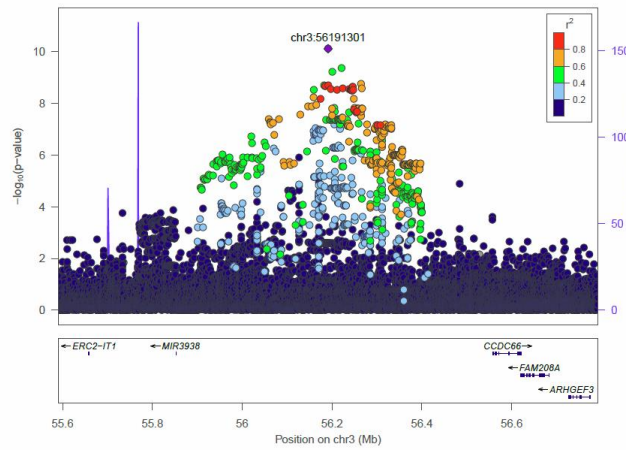

u) Hip trochanter area 12q14.1

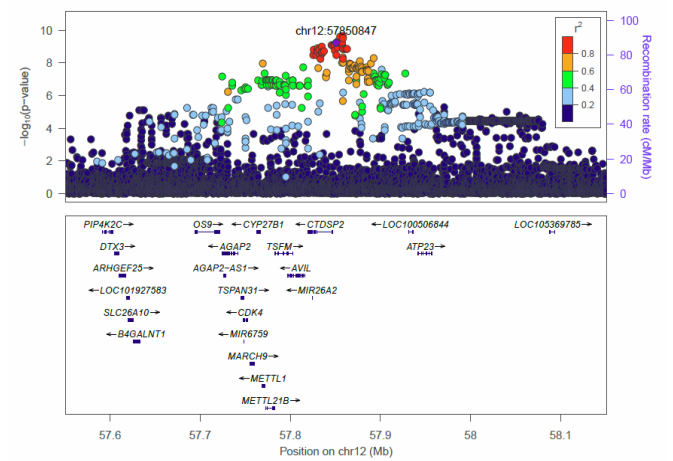

s) Hip trochanter area 20q11.22

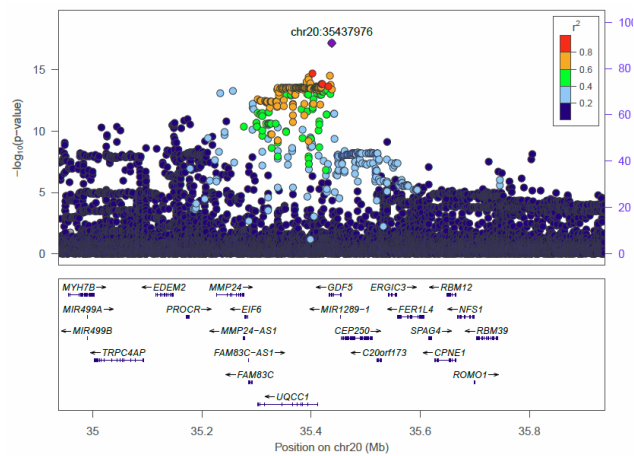

Supplementary Figure 3. Effect of rs11614913 on mir-196-a2

a)

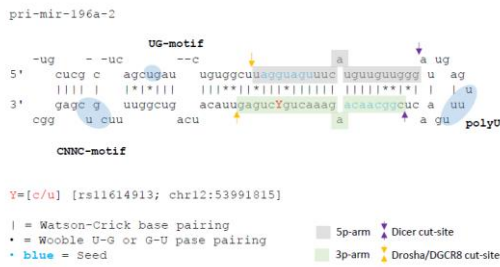

b)

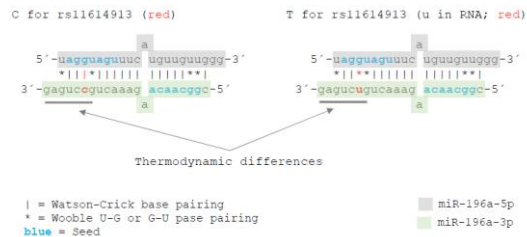

a) The secondary structure of miR-196a2 primary transcript (adapted from mirbase.org) showing the position of the rs11614913 variant with respect to known miR motifs and cut sites used by Drosha (orange arrows) and Dicer (purple arrows). The variant resides on the 3p-arm (the passenger strand), whereas it is the 5p-arm that represents the guiding strand for miR-196a-2 used by Ago for post-transcriptional regulation of target mRNA's. b) The mature miR-196a-2 duplex with C- and T-alleles (rs11614913) shown to the left and right, respectively. The C-allele (left) results in a Watson-Crick bond in the mature miR duplex whereas the T-allele (right), U in RNA, introduces a wobble bond (asterisk signs).

Supplementary Figure 4. Fraction of genes with predicted miR-196a-5p 3'UTR recognition sites that have experimental support

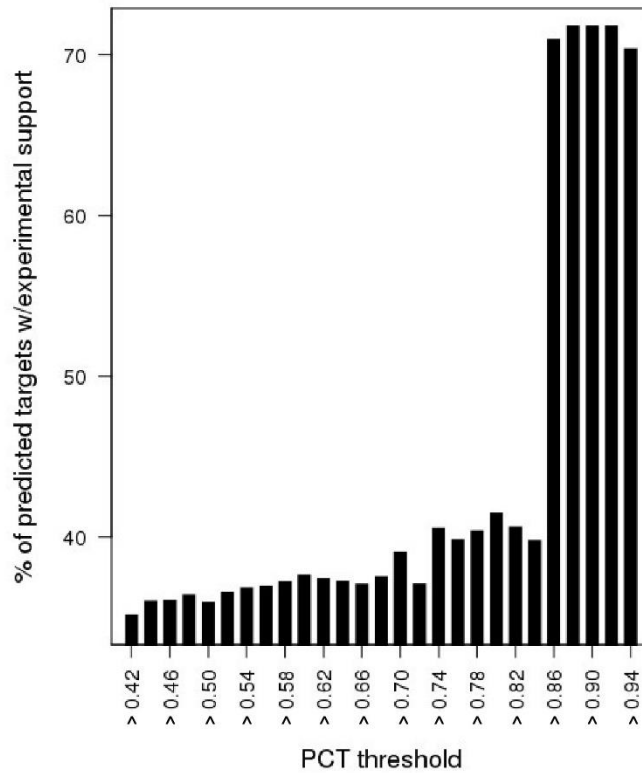

The fraction of genes with *in silico* predicted 3'UTR recognition sites for miR-196a-5p that have experimental support (Tarbase V8) increases for predictions with higher PCT scores. Source data are provided as a Source Data file.



Supplementary Figure 5. The effect of the rs11614913 variant in MIR196A2 on target gene expression in human HEK293 cell line

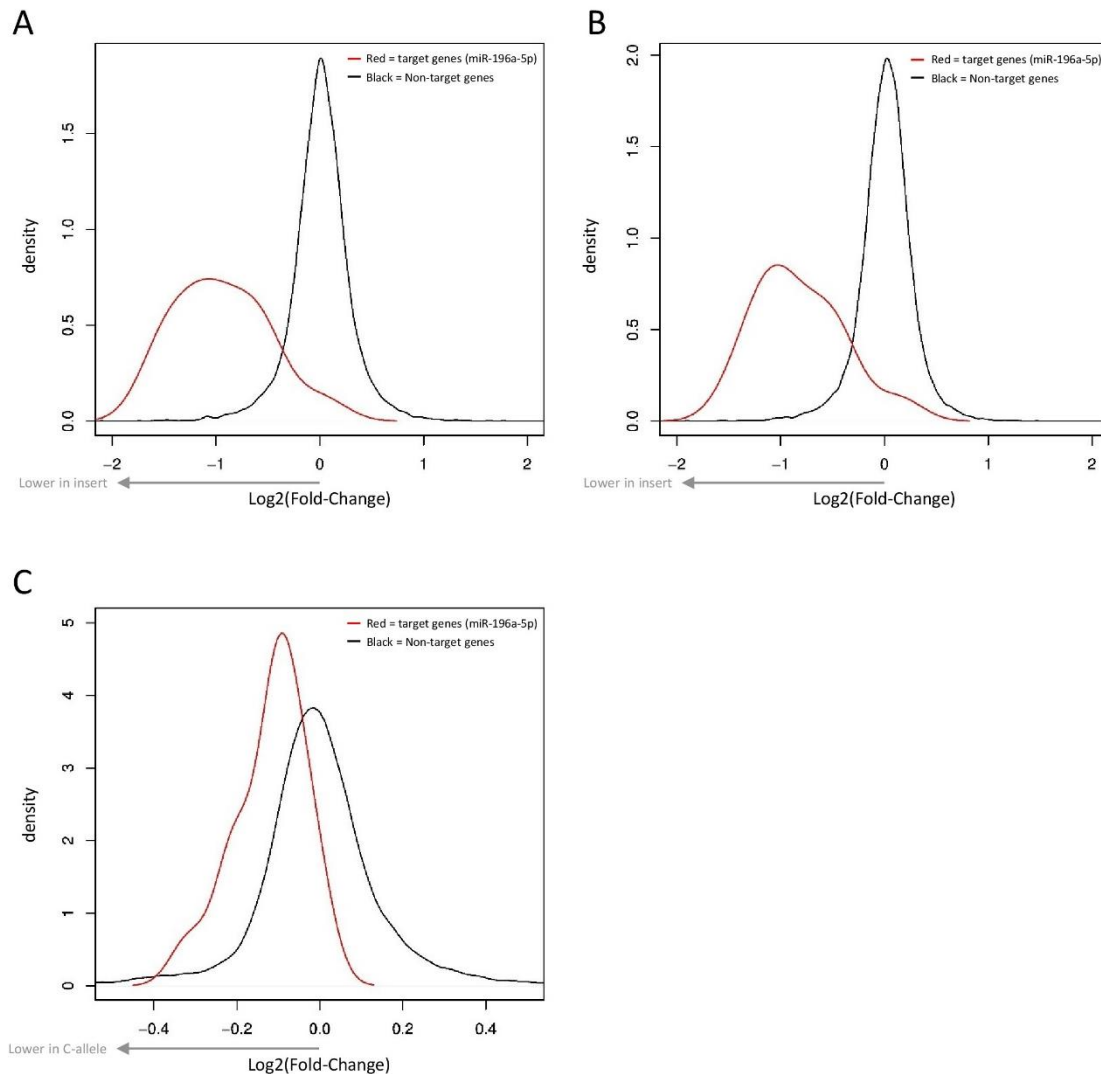

Density plots shown for log2 fold-change values derived from all pair-wise comparisons; A) C-allele compared with empty vector insert; B) T-allele compared with empty vector insert and C) C-allele compared with T-allele where negative log2-fold values reflect downregulation in C-allele. In all instances, the red lines represent density of the fourteen miR-196a-5p target genes whereas the black line represents other non-target genes. The direction of effect for each plot is indicated below the x-axis (grey arrows). Source data are provided as a Source Data file.

Supplementary Figure 6. Downregulation in MIR196A2 insert cells for genes with predicted 3'UTR recognition sites.

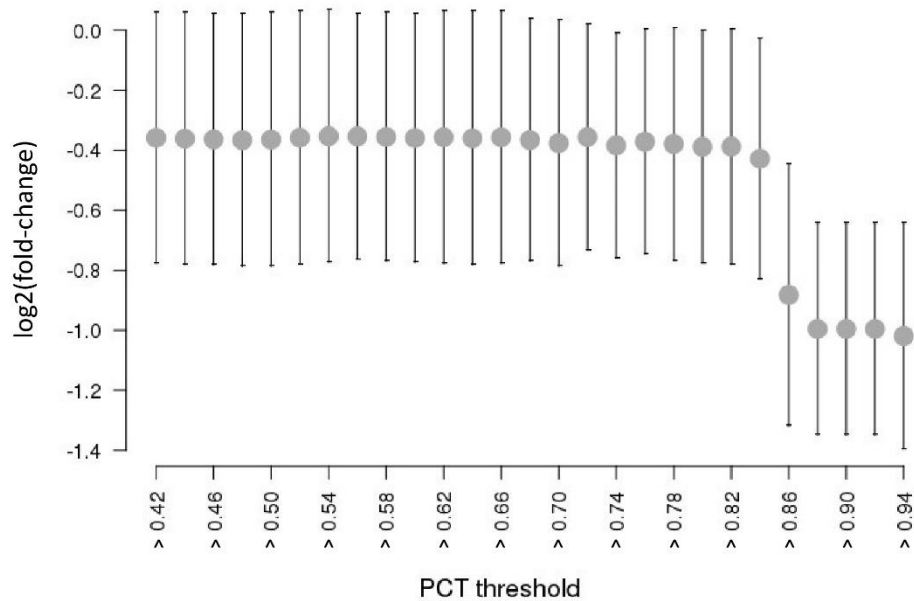

The mean for log2 fold change values derived from MIR196A2 insert versus empty vector controls for genes with *in silico* predicted 3'UTR recognition sites shown as grey dots (y-axis) calculated at incremental steps of thresholding the  $P_{CT}$  score (x-axis); the lines represent one standard deviation from the mean. with respect to  $P_{CT}$  score. Negative log2 fold change values represents downregulation in MIR196A2 insert cells compared with empty controls. Note the change point for the mean in log2 fold change values at  $P_{CT} > 0.86$ , highlighting the value of using  $P_{CT}$  score for defining a list of high-confidence miR-196a-5p target genes. Source data are provided as a Source Data file.

## Supplementary Figure 7. Gene set enrichment for the entire set of genes suppressed by MIR196A insert.

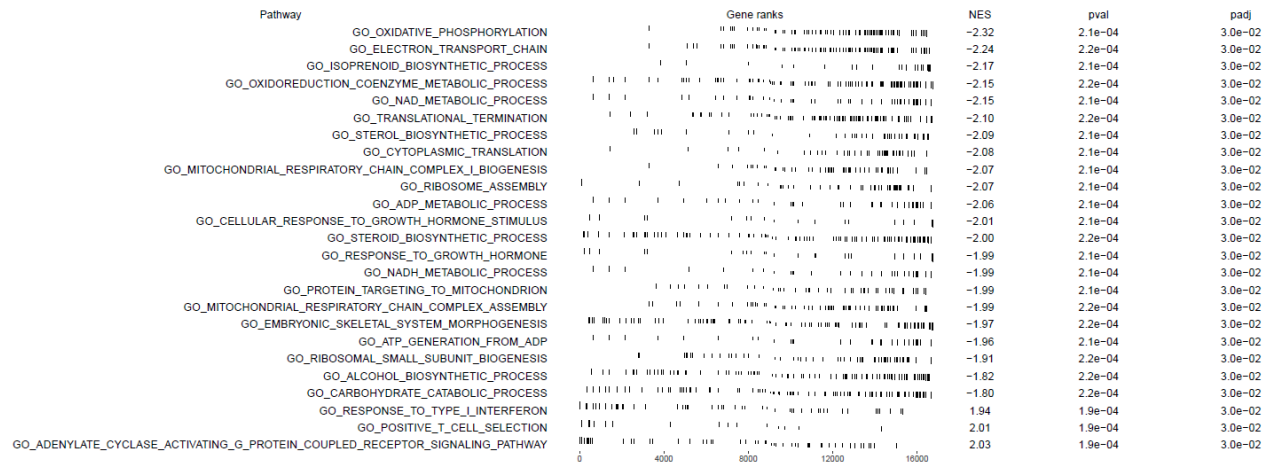

Gene set enrichment for the MIR196A insert versus empty vector control comparison. In this analysis, the entire set of genes tested for differential expression are ranked on the basis of log2 fold change values, and then assessed for whether specific functional gene ontology terms are enriched at the high or low end of the gene rankings. We find significant enrichment (P-adjusted < 0.05) for 31 functional GO terms ordered on the figure from negative to positive NES enrichment values, from top to bottom, respectively. The negative NES values represent enriched GO terms among downregulated genes and *vice versa*. Source data are provided as a Source Data file.

Supplementary Figure 8. Correlation between rs11614913 and rs371683123 at 12q13.13 and expression of the *HOXC8* gene in adipose tissue.

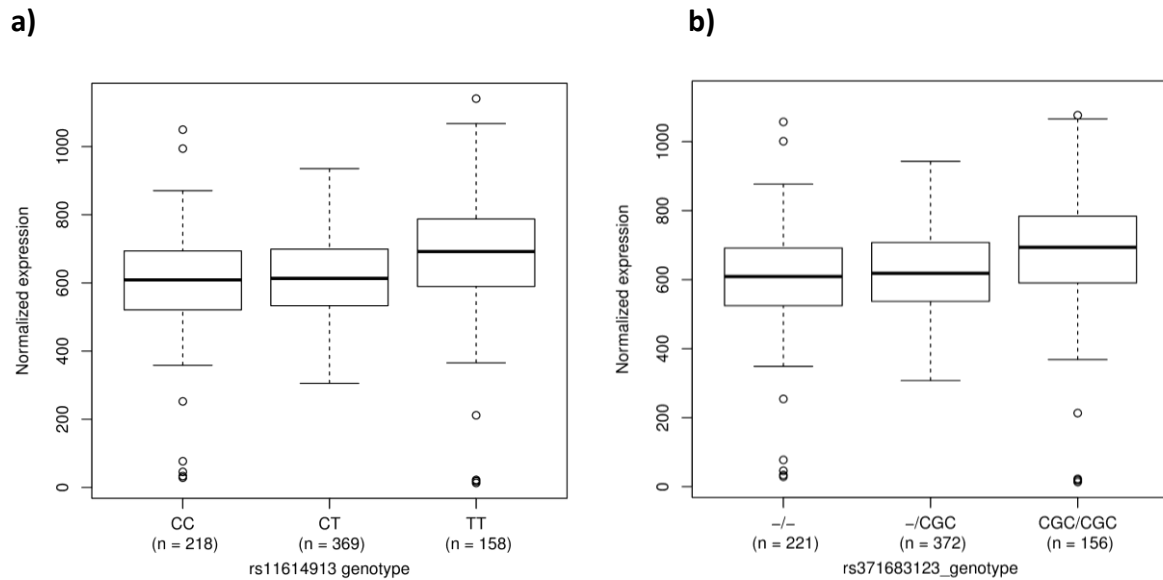

a) Correlation between expression of *HOXC8* in adipose tissue and genotypes of a) rs11614913 ( $P = 5.9 \times 10^{-9}$ ,  $\beta = 0.31$ ), and b) rs371683123 ( $P = 1.3 \times 10^{-9}$ ,  $\beta = 0.32$ ). The number of individuals with the respective genotypes are shown below the genotype.

The bottom and top of the box represent first and third quartiles, the line inside the box is the median and whiskers  $\pm 1.5$  interquartile range. The open circles represent outliers that lie beyond the extremes of the whiskers.

Association between variant and gene expression was estimated using a generalized linear regression, assuming additive genetic effect and log-transformed gene expression estimates, adjusting for measurements of sequencing artefacts, demography variables, and hidden covariates. Source data are provided as a Source Data file.

## Supplementary Figure 9. Correlation between effects of GIANT height variants on adult height and effects on DXA areas

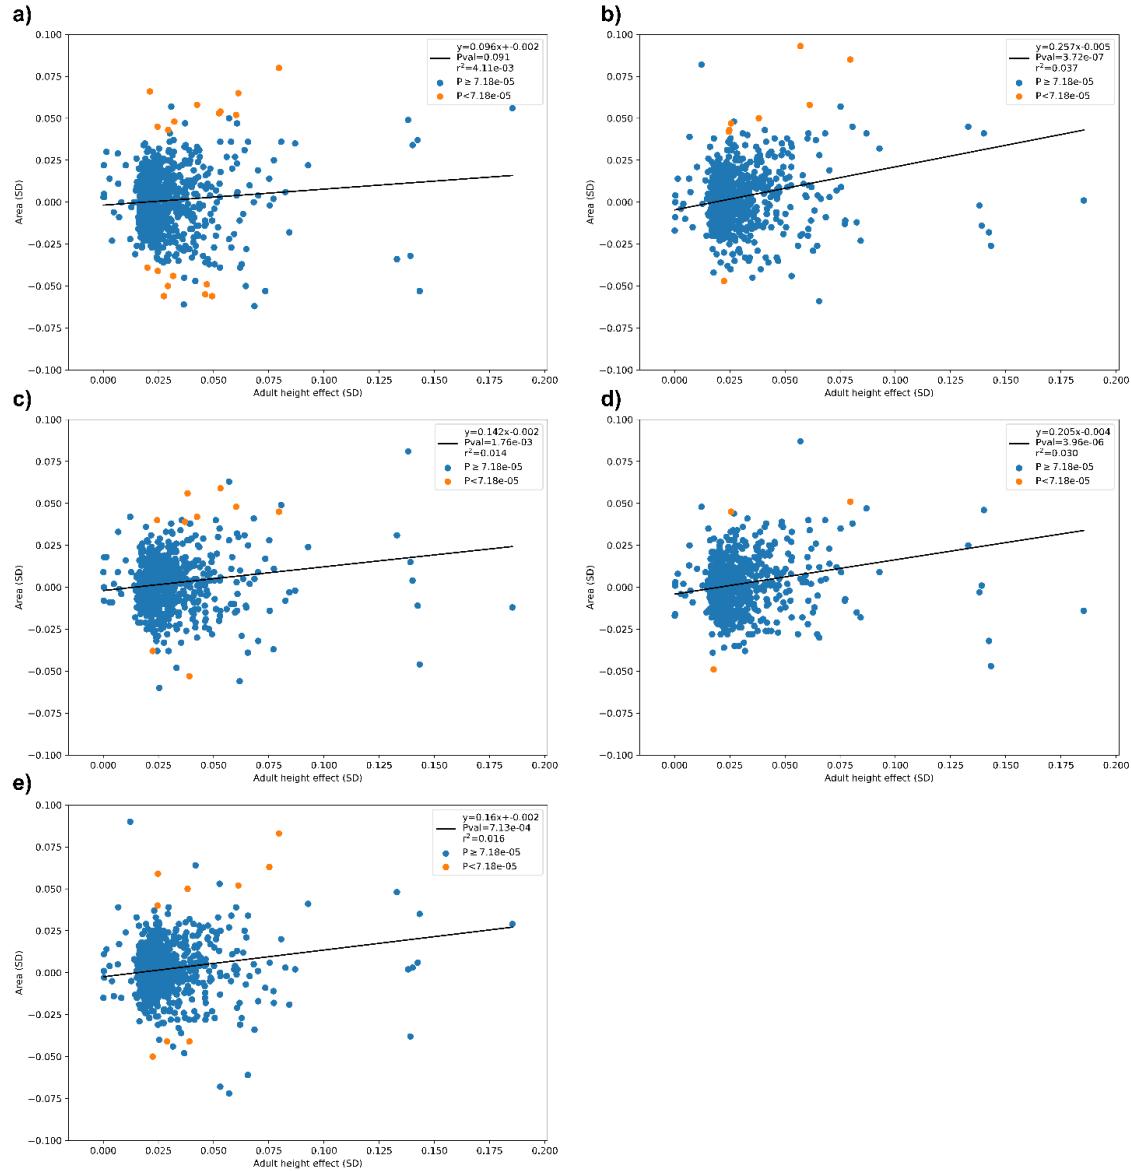

Scatter plot showing correlation between the effects on adult height of the 697 significant variants reported by GIANT<sup>10</sup> (x-axis) and area measures (y-axis) in our data. The variants effect on height is derived from the GIANT dataset excluding the Icelandic data. The allele used for each variant is the one that has a positive effect on adult height. The black solid line represents linear regression weighted by allele frequency AF ( $AF \times (1 - AF)$ ). The orange colored points represent significant associations with area measures ( $P \leq 7.18 \times 10^{-5}$ ), accounting for the 697 variants tested. **a)** Spine area (L1-L4), **b)** Total hip area, **c)** Femoral neck area, **d)** Intertrochanteric area, **e)** Trochanter area. Source data are provided as a Source Data file.

# Supplementary Figure 10. Correlation between effects of GEFOS BMD variants on BMD and effects on DXA areas

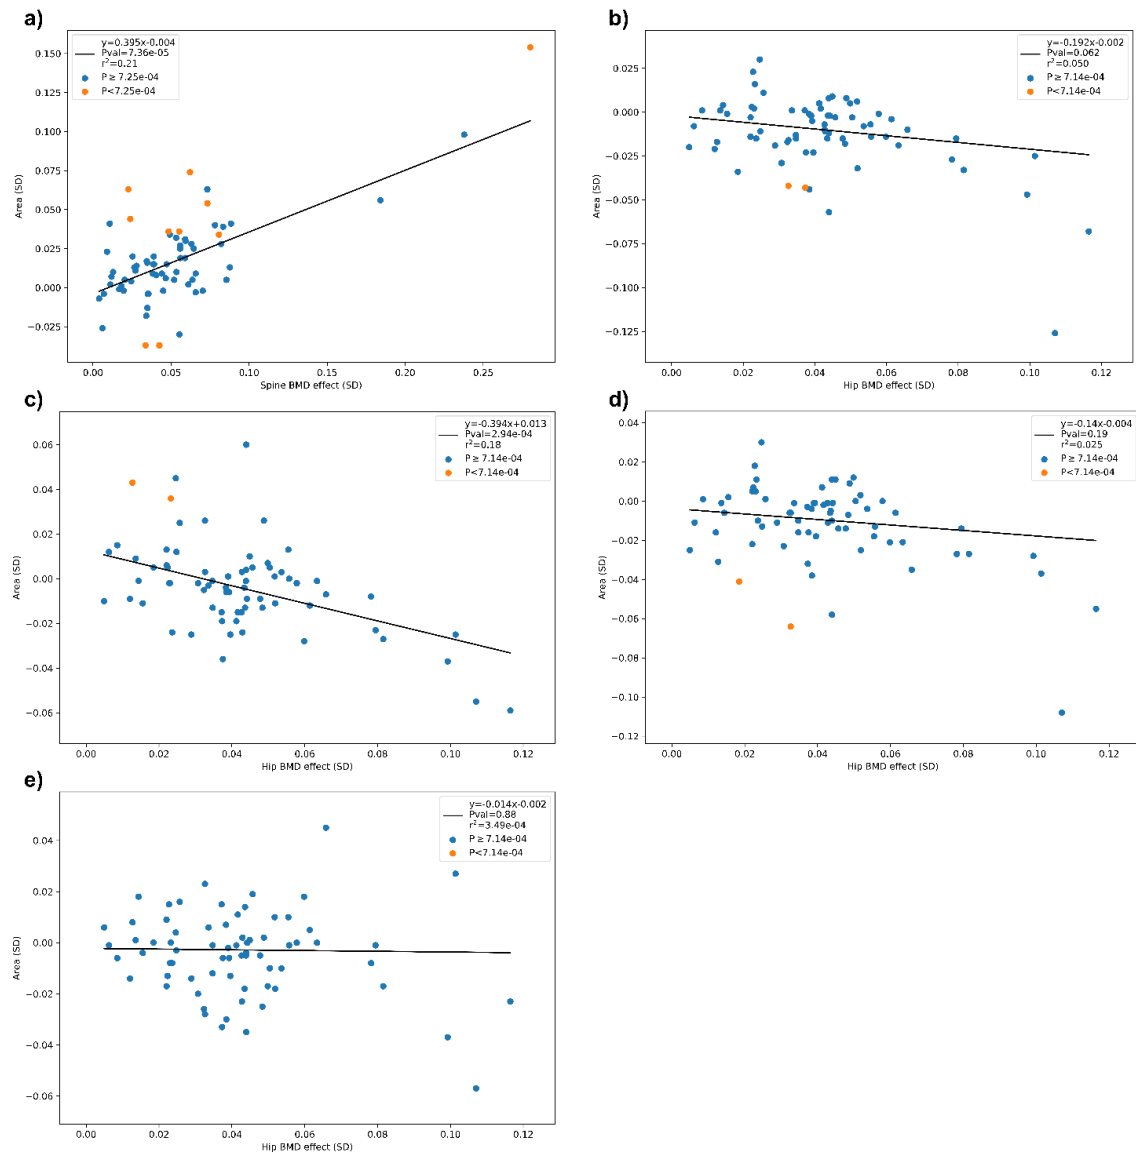

Scatter plot showing correlation between the effects on BMD in the GEFOS dataset <sup>11</sup> (x-axis) between the reported 72 significant variants and area measures (y-axis) in our data. This dataset did not include the Icelandic samples in the meta-analysis. The allele used of each variant is the one that has a positive effect on BMD. The black solid line represents linear regression weighted by allele frequency AF ( $AF \times (1 - AF)$ ). The orange colored points represent significant associations with area measures ( $P \leq 7.1 \times 10^{-4}$ ), accounting for the 72 variants tested. **a)** Spine area (L1-L4) and spine BMD, **b)** Total hip area and hip BMD, **c)** Femoral neck area and hip BMD, **d)** Intertrochanteric area and hip BMD, **e)** Trochanter area and hip BMD. Source data are provided as a Source Data file.

Supplementary Figure 11. Gating strategy to sort GFP positive HEK293T cells

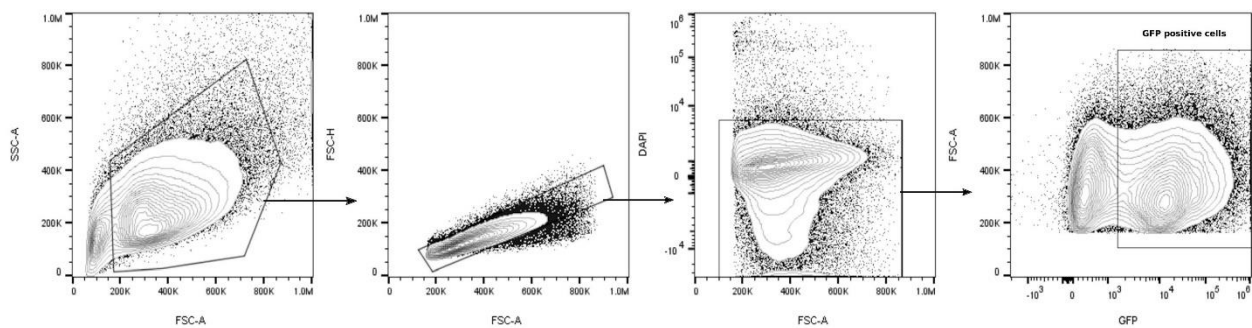

## Supplementary Tables

Supplementary Table 1. Conditional analysis between variants at three loci in the Icelandic discovery dataset: a) between two variants at 15q25.2 at the *ADAMTSL3* and *SH3GL3* genes, b) between the two variants at the *SOX9* locus that associate with intertrochanteric area in the Icelandic discovery dataset and two recently published variants that associate with hip shape measures, and c) between the 4q31.21 Icelandic variant and a recently published variant associated with hip shape measure

### a) 15q25.2, spine area

| rs_name   | Pos_build38    | Effect (SD) | P       | rs2585073      |                  | rs8036748      |                  |
|-----------|----------------|-------------|---------|----------------|------------------|----------------|------------------|
|           |                |             |         | r <sup>2</sup> | P <sub>adj</sub> | r <sup>2</sup> | P <sub>adj</sub> |
| rs8036748 | chr15:83903084 | -0.060      | 1.3E-10 | 0.245          | 1.3E04           | –              | –                |
| rs2585073 | chr15:83597138 | 0.063       | 1.3E-10 | –              | –                | 0.245          | 1.2E-4           |

### b) 17q24.3, intertrochanteric area

| rs_name    | Pos_build38    | Effect (SD) | P       | rs12601029     |                  | rs1159421      |                  | rs2158915*     |                  | rs2160442*     |                  |
|------------|----------------|-------------|---------|----------------|------------------|----------------|------------------|----------------|------------------|----------------|------------------|
|            |                |             |         | r <sup>2</sup> | P <sub>adj</sub> | r <sup>2</sup> | P <sub>adj</sub> | r <sup>2</sup> | P <sub>adj</sub> | r <sup>2</sup> | P <sub>adj</sub> |
| rs12601029 | chr17:72007174 | 0.074       | 4.2E-14 | –              | –                | 0.371          | 1.8E-4           | 0.966          | 0.094            | 0.998          | 0.42             |
| rs1159421  | chr17:71962201 | -0.069      | 6.4E-14 | 0.371          | 2.8E-4           | –              | –                | 0.358          | 2.3E-4           | 0.371          | 2.0E-4           |
| rs2158915* | chr17:72004543 | 0.074       | 7.4E-14 | 0.966          | 0.18             | 0.358          | 2.5E-4           | –              | –                | 0.965          | 0.023            |
| rs2160442* | chr17:72008059 | 0.075       | 4.6E-14 | 0.998          | 0.47             | 0.371          | 1.4E-4           | 0.965          | 0.29             | –              | –                |

rs2158915 and rs2160442 associate with hip shape measures HSM1 and HSM5, respectively (Baird, et al., JBMR, 2018)



**c) 4q31.21, femoral neck area**

| rs_name    | Pos_build38    | Effect<br>(SD) | P       | rs6537291*     |                  | rs12507427     |                  |
|------------|----------------|----------------|---------|----------------|------------------|----------------|------------------|
|            |                |                |         | r <sup>2</sup> | P <sub>adj</sub> | r <sup>2</sup> | P <sub>adj</sub> |
| rs12507427 | chr4:144646319 | 0.059          | 1.2E-10 | 0.114          | 3.10E-7          | –              | –                |
| rs6537291* | chr4:144542922 | 0.046          | 6.8E-7  | –              | –                | 0.114          | 3.1E-3           |

rs6537291\* associates with hip shape measure HSM2 (Baird, et al., JBMR, 2018)

Supplementary Table 2. The number of individuals in all participating studies split by phenotype

|                            | Iceland<br>deCODE | Denmark<br>PERF | The<br>Netherlands<br>Rotterdam<br>I,II,III | Australia<br>DOES | UK<br>UKBiobank | UK<br>arcOGEN | Sweden<br>MDC | Hong<br>Kong<br>Mr/Ms<br>OS | Korea<br>AMC | Vietnam<br>VOS | Total   |
|----------------------------|-------------------|-----------------|---------------------------------------------|-------------------|-----------------|---------------|---------------|-----------------------------|--------------|----------------|---------|
| <b>DXA area measures</b>   |                   |                 |                                             |                   |                 |               |               |                             |              |                |         |
| Spine L1-L4                | 29,059            | 4,067           | 5,208                                       | 1,262             | 4,395           |               |               | 3,755                       | 650          | 1,940          | 50,336  |
| Hip total                  | 28,900            | 1,707           | 6,205                                       |                   |                 |               |               | 3,753                       |              | 1,946          | 42,511  |
| Femoral neck               | 28,954            | 1,707           | 6,413                                       | 1,263             |                 |               |               | 3,753                       | 652          | 1,946          | 44,688  |
| Intertrochanteric          | 28,936            | 1,707           | 6,205                                       |                   |                 |               |               | 3,753                       |              | 1,943          | 42,544  |
| Trochanteric               | 28,944            | 1,705           | 6,360                                       |                   |                 |               |               | 3,753                       |              | 1,958          | 42,720  |
| <b>Hip osteoarthritis</b>  |                   |                 |                                             |                   |                 |               |               |                             |              |                |         |
| cases                      | 5,134             | 413             | 657                                         |                   | 11,437          | 3,312         | 505           |                             |              |                | 21,458  |
| controls                   | 183,824           | 1,538           | 8,643                                       |                   | 397,218         | 9,268         | 876           |                             |              |                | 601,367 |
| <b>Knee osteoarthritis</b> |                   |                 |                                             |                   |                 |               |               |                             |              |                |         |
| cases                      | 3,322             | 460             | 1,486                                       |                   | 19,205          | 2,421         | 427           |                             |              |                | 27,321  |
| controls                   | 144,202           | 1,538           | 7,437                                       |                   | 389,362         | 9,268         | 876           |                             |              |                | 552,683 |
| <b>Hip fractures</b>       |                   |                 |                                             |                   |                 |               |               |                             |              |                |         |
| cases                      | 8,068             | 193             |                                             | 129               | 1,788           |               |               |                             |              |                | 10,178  |
| controls                   | 296,532           | 1,538           |                                             | 516               | 405,154         |               |               |                             |              |                | 703,740 |
| <b>Vertebral fractures</b> |                   |                 |                                             |                   |                 |               |               |                             |              |                |         |
| cases                      | 1,317             | 877             |                                             | 200               | 899             |               |               |                             |              |                | 3,293   |
| controls                   | 178,399           | 1,538           |                                             | 516               | 407,668         |               |               |                             |              |                | 588,121 |

The number of samples in each sample-set are shown for the respective phenotype. The country of origin of the sample-set is shown and the study acronym (see Methods). deCODE is the deCODE genetics study, PERF is Prospective Epidemiological Risk Factor study, Rotterdam I,II,III is the Rotterdam studies, DOES is Dubbo Osteoporosis Epidemiology Study, arcOGEN is the Arthritis Research UK Osteoarthritis Genetics Study, MDC is the Swedish Malmo Diet and Cancer study, Mr/Ms OS are the Mr and Ms Osteoporosis studies, AMC is Asan Medical Center study, and VOS is the Vietnam Osteoporosis Study.

Supplementary Table 3. Gene function analysis. A) Analysis of gene ontology overrepresentation for the high-confidence miR-196a-5p target genes as carried out in Panther (pantherdb.org); showing results at FDR < 5% ordered according to decreasing level of overrepresentation ratios. B) The seventeen miR-196a-5p target genes listed out with mean expression in HEK293T (inhouse data) and osteoblasts (Fantom5 data).

| A) GO biological process                                                    |                               | Overrepresentation<br>(observed/expected)               | P-value                            | FDR   |
|-----------------------------------------------------------------------------|-------------------------------|---------------------------------------------------------|------------------------------------|-------|
| anterior/posterior pattern specification (GO:0009952)                       |                               | 25.17                                                   | 1.68E-05                           | 0.024 |
| skeletal system development (GO:0001501)                                    |                               | 13.56                                                   | 2.36E-05                           | 0.029 |
| regulation of transcription by RNA polymerase II (GO:0006357)               |                               | 4.98                                                    | 3.85E-06                           | 0.012 |
| regulation of transcription, DNA-templated (GO:0006355)                     |                               | 4.17                                                    | 4.77E-06                           | 0.013 |
| regulation of nucleic acid-templated transcription (GO:1903506)             |                               | 4.11                                                    | 5.54E-06                           | 0.013 |
| regulation of RNA biosynthetic process (GO:2001141)                         |                               | 4.1                                                     | 5.67E-06                           | 0.011 |
| regulation of cellular macromolecule biosynthetic process (GO:2000112)      |                               | 4.06                                                    | 1.40E-06                           | 0.022 |
| regulation of macromolecule biosynthetic process (GO:0010556)               |                               | 3.93                                                    | 1.97E-06                           | 0.016 |
| regulation of RNA metabolic process (GO:0051252)                            |                               | 3.85                                                    | 1.07E-05                           | 0.017 |
| regulation of cellular biosynthetic process (GO:0031326)                    |                               | 3.81                                                    | 2.84E-06                           | 0.015 |
| regulation of biosynthetic process (GO:0009889)                             |                               | 3.74                                                    | 3.47E-06                           | 0.014 |
| regulation of nucleobase-containing compound metabolic process (GO:0019219) |                               | 3.59                                                    | 2.16E-05                           | 0.028 |
| regulation of gene expression (GO:0010468)                                  |                               | 3.52                                                    | 6.72E-06                           | 0.012 |
| B) HGNC names for miR-196a-5p target genes                                  | Official full name            | Ontology<br>GO:0001501<br>(skeletal system development) | Osteoblasts;<br>median (min, max)* |       |
| GAN                                                                         | gigaxonin                     | No                                                      | 3.31 (2.66,7,24)                   |       |
| HMGA2                                                                       | high mobility group AT-hook 2 | Yes                                                     | 43.46 (31.3, 92,33)                |       |

|               |                                                  |         |                         |
|---------------|--------------------------------------------------|---------|-------------------------|
| HOXA7         | homeobox A7                                      | Yes     | 3.13 (2.07, 9.1)        |
| HOXA9         | homeobox A9                                      | Yes     | 9.96 (5.35, 12.42)      |
| HOXC8         | homeobox C8                                      | Yes     | 3.31 (0, 7.31)          |
| LCOR          | ligand dependent nuclear<br>receptor corepressor | No      | 4.51 (2.27, 14.61)      |
| LIN28B        | lin-28 homolog B                                 | No      | 0 (0, 0)                |
| NR6A1         | nuclear receptor subfamily 6<br>group A member 1 | No      | 0 (0, 0.18)             |
| NRAS          | NRAS proto-oncogene, GTPase                      | No      | 31.3 (11.37, 89.01)     |
| PBX1          | PBX homeobox 1                                   | Yes     | 2.03 (0, 12.42)         |
| POTEG         | POTE ankyrin domain family<br>member G           | No      | Unknown                 |
| POTEM         | POTE ankyrin domain family<br>member D           | No      | Unknown                 |
| PPP1R15B      | protein phosphatase 1<br>regulatory subunit 15B  | No      | 18.19 (13.84,<br>22.58) |
| RP1-170O19.20 | Uncharacterized protein                          | Unknown | Unknown                 |
| USP15         | ubiquitin specific peptidase 15                  | No      | 18.36 (4.55, 32.55)     |
| ZBTB26        | zinc finger and BTB domain<br>containing 26      | No      | 2.21 (0.66, 3.01)       |
| ZMYND11       | zinc finger MYND-type<br>containing 1            | No      | 7.19 (6.02, 13.95)      |

\* Fantom5 TSS dataset; median (min, max) TPM from osteoblasts, sample ID's: CNhs11385, CNhs11980, CNhs11311, CNhs12036, CNhs12035

Supplementary Table 4. Differential expression of miR-196a-5p target genes in pairwise comparisons for gene expression experiments carried out in cells transfected with MIR196A2 C-allele insert, T-allele insert and empty vector control

**A) T-allele versus empty controls\***

| Gene     | target_id          | Chr   | Start     | End       | Strand | log2<br>FoldChange | P-value  | P-value<br>(adjusted) |
|----------|--------------------|-------|-----------|-----------|--------|--------------------|----------|-----------------------|
| HOXA7    | ENSG00000122592.7  | chr7  | 27153716  | 27156677  | -      | -1.46              | 5.43E-29 | 4.73E-26              |
| NR6A1    | ENSG00000148200.16 | chr9  | 124517275 | 124771277 | -      | -0.96              | 1.76E-26 | 1.18E-23              |
| HMG2A2   | ENSG00000149948.13 | chr12 | 65824131  | 65966295  | +      | -1.26              | 9.70E-21 | 3.12E-18              |
| HOXA9    | ENSG00000078399.16 | chr7  | 27162435  | 27165530  | -      | -1.10              | 1.15E-19 | 3.26E-17              |
| PBX1     | ENSG00000185630.18 | chr1  | 164555584 | 164564015 | +      | -0.70              | 3.48E-19 | 9.53E-17              |
| HOXC8    | ENSG00000037965.5  | chr12 | 54009106  | 54012362  | +      | -1.09              | 1.02E-17 | 2.46E-15              |
| LIN28B   | ENSG00000187772.7  | chr6  | 104957048 | 105083332 | +      | -1.23              | 1.01E-14 | 1.54E-12              |
| NRAS     | ENSG00000213281.4  | chr1  | 114704469 | 114716894 | -      | -0.89              | 3.95E-12 | 4.33E-10              |
| ZMYND11  | ENSG00000015171.18 | chr10 | 134465    | 237651    | +      | -1.00              | 2.67E-11 | 2.59E-09              |
| PPP1R15B | ENSG00000158615.8  | chr1  | 204403387 | 204411791 | -      | -0.63              | 9.72E-07 | 4.22E-05              |
| LCOR     | ENSG00000196233.12 | chr10 | 96832260  | 96964431  | +      | -0.48              | 0.0002   | 0.0041                |
| ZBTB26   | ENSG00000171448.8  | chr9  | 122915566 | 122931500 | -      | -0.44              | 0.0002   | 0.0048                |
| GAN      | ENSG00000261609.4  | chr16 | 81314952  | 81390884  | +      | -0.40              | 0.0268   | 0.1669                |
| USP15    | ENSG00000135655.14 | chr12 | 62260338  | 62416389  | +      | 0.14               | 0.3645   | 0.6748                |

\*Negative log2FC reflect lower expression in T-allele

**B) C-allele versus empty controls\***

| Gene     | target_id          | Chr   | Start     | End       | Strand | log2<br>FoldChange | P-value  | P-value<br>(adjusted) |
|----------|--------------------|-------|-----------|-----------|--------|--------------------|----------|-----------------------|
| HMGA2    | ENSG00000149948.13 | chr12 | 65824131  | 65966295  | +      | -1.47              | 7.68E-63 | 2.37E-59              |
| HOXA7    | ENSG00000122592.7  | chr7  | 27153716  | 27156677  | -      | -1.51              | 1.83E-59 | 4.70E-56              |
| NR6A1    | ENSG00000148200.16 | chr9  | 124517275 | 124771277 | -      | -1.07              | 1.80E-41 | 1.47E-38              |
| HOXC8    | ENSG00000037965.5  | chr12 | 54009106  | 54012362  | +      | -1.31              | 9.57E-38 | 5.68E-35              |
| LIN28B   | ENSG00000187772.7  | chr6  | 104957048 | 105083332 | +      | -1.55              | 5.44E-35 | 2.89E-32              |
| PBX1     | ENSG00000185630.18 | chr1  | 164555584 | 164564015 | +      | -0.80              | 1.89E-26 | 4.71E-24              |
| NRAS     | ENSG00000213281.4  | chr1  | 114704469 | 114716894 | -      | -1.09              | 2.30E-26 | 5.63E-24              |
| HOXA9    | ENSG00000078399.16 | chr7  | 27162435  | 27165530  | -      | -1.12              | 6.79E-18 | 7.71E-16              |
| ZMYND11  | ENSG00000015171.18 | chr10 | 134465    | 237651    | +      | -1.01              | 2.96E-12 | 2.00E-10              |
| ZBTB26   | ENSG00000171448.8  | chr9  | 122915566 | 122931500 | -      | -0.55              | 1.11E-07 | 3.69E-06              |
| PPP1R15B | ENSG00000158615.8  | chr1  | 204403387 | 204411791 | -      | -0.70              | 4.15E-07 | 1.23E-05              |
| LCOR     | ENSG00000196233.12 | chr10 | 96832260  | 96964431  | +      | -0.57              | 0.0010   | 0.0101                |
| GAN      | ENSG00000261609.4  | chr16 | 81314952  | 81390884  | +      | -0.51              | 0.0019   | 0.0175                |
| USP15    | ENSG00000135655.14 | chr12 | 62260338  | 62416389  | +      | 0.02               | 0.8944   | 0.9633                |

\*Negative log2FC reflect lower expression in C-allele

**C) C-allele versus T-allele\***

| Gene     | target_id          | Chr   | Start     | End       | Strand | log2<br>FoldChange | P-value | P-value<br>(adjusted) |
|----------|--------------------|-------|-----------|-----------|--------|--------------------|---------|-----------------------|
| LIN28B   | ENSG00000187772.7  | chr6  | 104957048 | 105083332 | +      | -0.32              | 0.0344  | 0.9974                |
| NRAS     | ENSG00000213281.4  | chr1  | 114704469 | 114716894 | -      | -0.20              | 0.0987  | 0.9974                |
| HMGGA2   | ENSG00000149948.13 | chr12 | 65824131  | 65966295  | +      | -0.20              | 0.1309  | 0.9974                |
| HOXC8    | ENSG00000037965.5  | chr12 | 54009106  | 54012362  | +      | -0.22              | 0.1358  | 0.9974                |
| PBX1     | ENSG00000185630.18 | chr1  | 164555584 | 164564015 | +      | -0.10              | 0.2065  | 0.9974                |
| NR6A1    | ENSG00000148200.16 | chr9  | 124517275 | 124771277 | -      | -0.10              | 0.3144  | 0.9974                |
| ZBTB26   | ENSG00000171448.8  | chr9  | 122915566 | 122931500 | -      | -0.11              | 0.3189  | 0.9974                |
| USP15    | ENSG00000135655.14 | chr12 | 62260338  | 62416389  | +      | -0.12              | 0.4562  | 0.9974                |
| GAN      | ENSG00000261609.4  | chr16 | 81314952  | 81390884  | +      | -0.11              | 0.5225  | 0.9974                |
| LCOR     | ENSG00000196233.12 | chr10 | 96832260  | 96964431  | +      | -0.08              | 0.5794  | 0.9974                |
| PPP1R15B | ENSG00000158615.8  | chr1  | 204403387 | 204411791 | -      | -0.06              | 0.6564  | 0.9974                |
| HOXA7    | ENSG00000122592.7  | chr7  | 27153716  | 27156677  | -      | -0.05              | 0.7152  | 0.9974                |
| HOXA9    | ENSG00000078399.16 | chr7  | 27162435  | 27165530  | -      | -0.01              | 0.9243  | 0.9974                |
| ZMYND11  | ENSG00000015171.18 | chr10 | 134465    | 237651    | +      | 0.00               | 0.9755  | 0.9974                |

\*Negative log2FC reflect lower expression in C-allele

Supplementary Table 5. Expression correlation between HOXC8 and rs11614913 and rs371683123 before and after conditioning on the other variant

| SNP         | Position_build38 | EA/OA      | EA Freq. | Gene location  | P value | Effect (s.d.) | P value <sub>adj</sub> | Effect (s.d.) <sub>adj</sub> |
|-------------|------------------|------------|----------|----------------|---------|---------------|------------------------|------------------------------|
| rs11614913  | chr12:53991815   | T/C        | 47.8     | in MIR196A2    | 5.9E-09 | -0.306        | 0.96                   | 0.008                        |
| rs371683123 | chr12:54009024   | delCGC/CGC | 47.7     | HOXC8 promoter | 1.3E-09 | -0.319        | 0.083                  | -0.327                       |

We tested the correlation between expression of *HOXC8* in adipose tissue samples from 746 individuals and genotypes of the two variants: rs11614913 in MIR196A2 and rs371683123 in the promoter region of the HOXC8 gene. The two-sided P values and effect, in standard deviations, is shown before and after conditioning on the other variant: rs11614913 before and after conditioning on rs371683123, and rs371683123 before and after conditioning on rs11614913. EA is the effect allele, OA the other allele, EA Freq. is the effect allele frequency.



Supplementary Table 6. Association of DXA area markers with vertebral fractures in all sample-sets combined

| GWS Phenotype         | SNP         | Chr   | Pos      | Freq. | gene            | EA | OA | Vertebral fractures<br>(N = 3,293 / 588,121) |      |       |
|-----------------------|-------------|-------|----------|-------|-----------------|----|----|----------------------------------------------|------|-------|
|                       |             |       |          |       |                 |    |    | P value                                      | OR   | P het |
| Spine                 | rs11614913  | chr12 | 53991815 | 47.8  | <i>MIR196A2</i> | T  | C  | 0.025                                        | 1.07 | 0.055 |
| Spine/Hip_Total/Troch | rs143384    | chr20 | 35437976 | 37.0  | <i>GDF5</i>     | G  | A  | 0.11                                         | 0.96 | 0.43  |
| Spine                 | rs10917168  | chr1  | 22187397 | 28.4  | <i>WNT4</i>     | T  | A  | 0.017                                        | 1.08 | 0.69  |
| Spine                 | rs143793852 | chr18 | 49083087 | 43.4  | <i>DYM</i>      | C  | CA | 0.3                                          | 0.97 | 0.53  |
| Spine                 | rs8036748   | chr15 | 83903084 | 46.2  | <i>ADAMTSL3</i> | A  | T  | 0.78                                         | 0.99 | 0.15  |
| Spine                 | rs2585073   | chr15 | 83597138 | 34.9  | <i>SH3GL3</i>   | C  | G  | 0.11                                         | 1.05 | 0.44  |
| Spine                 | rs9341808   | chr6  | 80243540 | 47.1  | <i>BCKDHB</i>   | C  | A  | 0.48                                         | 0.98 | 0.043 |
| Spine                 | rs72979233  | chr11 | 74644478 | 25.7  | <i>CHRDLL2</i>  | G  | A  | 0.74                                         | 1.01 | 0.11  |
| Hip_Total/Inter/Troch | rs3753841   | chr1  | 1.03E+08 | 39.1  | <i>COL11A1</i>  | G  | A  | 0.78                                         | 0.99 | 0.96  |
| Hip_Total/Inter/Troch | rs9830173   | chr3  | 56191301 | 38.4  | <i>ERC2</i>     | C  | G  | 0.87                                         | 1    | 0.73  |
| Hip_Total             | rs1507462   | chr18 | 75979535 | 30.4  | .               | A  | G  | 0.24                                         | 1.04 | 0.86  |
| Hip_Total             | rs72834687  | chr17 | 61471400 | 24.2  | <i>TBX4</i>     | A  | G  | 0.72                                         | 0.99 | 0.56  |
| Hip_FN                | rs12507427  | chr4  | 1.45E+08 | 43.1  | <i>HHIP</i>     | A  | T  | 0.66                                         | 0.99 | 0.82  |
| Hip_Inter             | rs12601029  | chr17 | 72007174 | 33.5  | <i>SOX9</i>     | A  | G  | 0.79                                         | 0.99 | 0.75  |
| Hip_Inter             | rs1159421   | chr17 | 71962201 | 44.7  | <i>SOX9</i>     | T  | C  | 0.99                                         | 1    | 0.85  |
| Hip_Troch             | rs10783854  | chr12 | 57850847 | 35.6  | <i>CTDSP2</i>   | T  | C  | 0.41                                         | 1.02 | 0.23  |

Results are shown for all sample-sets combined. Phenotype refers to the DXA area phenotypes that were GWS in the discovery analyses. Troch refers to trochanter, Inter to intertrochanter, and FN to femoral neck. EA designate the effect allele and OA the other allele. N designates the number of individuals in the analyses; cases / controls. P het is the heterogeneity P value.

Supplementary Table 7. Association of height markers and BMD markers with DXA area measures in Iceland

| rsName     | Chr   | Pos_build38 | EAF   | EA | OA | P value | Effect | prior_Effect | DXA area phenotype | Prior_phenotype | Gene     | Impact     |
|------------|-------|-------------|-------|----|----|---------|--------|--------------|--------------------|-----------------|----------|------------|
| rs1014987  | chr1  | 22172331    | 0.273 | G  | C  | 2.1E-10 | 0.066  | 0.021        | Spine area         | Adult height    | .        | intergenic |
| rs143384   | chr20 | 35437976    | 0.370 | G  | A  | 9.9E-17 | 0.080  | 0.080        | Spine area         | Adult height    | GDF5     | 5'UTR      |
| rs1884897  | chr20 | 6632185     | 0.364 | A  | G  | 5.8E-07 | -0.049 | 0.047        | Spine area         | Adult height    | .        | intergenic |
| rs2072153  | chr17 | 49312652    | 0.317 | C  | G  | 4.2E-05 | -0.041 | 0.025        | Spine area         | Adult height    | ZNF652   | intron     |
| rs2257011  | chr15 | 83597393    | 0.480 | T  | G  | 5.7E-09 | -0.055 | 0.046        | Spine area         | Adult height    | SH3GL3   | intron     |
| rs2425163  | chr20 | 35844748    | 0.158 | G  | A  | 4.3E-07 | 0.065  | 0.061        | Spine area         | Adult height    | PHF20    | intron     |
| rs3118905  | chr13 | 50531198    | 0.760 | G  | A  | 2.3E-06 | 0.052  | 0.060        | Spine area         | Adult height    | .        | intergenic |
| rs3811958  | chr5  | 32771937    | 0.254 | G  | A  | 2.2E-07 | -0.056 | 0.028        | Spine area         | Adult height    | NPR3     | intron     |
| rs3825199  | chr12 | 93583178    | 0.244 | G  | A  | 1.4E-06 | 0.053  | 0.053        | Spine area         | Adult height    | .        | intergenic |
| rs4834927  | chr4  | 13192467    | 0.348 | G  | A  | 6.8E-05 | -0.039 | 0.020        | Spine area         | Adult height    | .        | intergenic |
| rs4896582  | chr6  | 142382740   | 0.736 | G  | A  | 5.8E-07 | 0.054  | 0.053        | Spine area         | Adult height    | ADGRG6   | intron     |
| rs648831   | chr6  | 80246491    | 0.482 | T  | C  | 3.6E-07 | 0.048  | 0.032        | Spine area         | Adult height    | BCKDHB   | intron     |
| rs7043114  | chr9  | 92625701    | 0.427 | C  | T  | 4.9E-06 | 0.043  | 0.029        | Spine area         | Adult height    | IPPK     | intron     |
| rs7162542  | chr15 | 83845538    | 0.507 | G  | C  | 2.7E-09 | -0.056 | 0.049        | Spine area         | Adult height    | ADAMTSL3 | intron     |
| rs7517682  | chr1  | 103054033   | 0.449 | G  | A  | 1.5E-06 | 0.045  | 0.025        | Spine area         | Adult height    | COL11A1  | intron     |
| rs7567288  | chr2  | 133677253   | 0.207 | C  | T  | 1.7E-05 | -0.050 | 0.029        | Spine area         | Adult height    | .        | intergenic |
| rs9967417  | chr18 | 49433130    | 0.433 | G  | C  | 1.1E-09 | 0.058  | 0.043        | Spine area         | Adult height    | DYM      | intron     |
| rs9993613  | chr4  | 72610297    | 0.508 | T  | G  | 2.5E-06 | -0.044 | 0.032        | Spine area         | Adult height    | .        | intergenic |
| rs10748128 | chr12 | 69433878    | 0.385 | T  | G  | 3.0E-07 | 0.050  | 0.038        | Total hip area     | Adult height    | .        | intergenic |
| rs10877030 | chr12 | 57862931    | 0.648 | T  | G  | 1.4E-05 | 0.043  | 0.025        | Total hip area     | Adult height    | .        | intergenic |
| rs2425163  | chr20 | 35844748    | 0.158 | G  | A  | 8.7E-06 | 0.058  | 0.061        | Total hip area     | Adult height    | PHF20    | intron     |
| rs6879260  | chr5  | 180304014   | 0.589 | C  | T  | 1.0E-06 | 0.047  | 0.026        | Total hip area     | Adult height    | GFPT2    | intron     |

|            |       |           |       |   |   |         |        |       |                      |              |         |            |
|------------|-------|-----------|-------|---|---|---------|--------|-------|----------------------|--------------|---------|------------|
| rs7517682  | chr1  | 103054033 | 0.449 | G | A | 9.7E-06 | 0.042  | 0.025 | Total hip area       | Adult height | COL11A1 | intron     |
| rs763318   | chr4  | 12961950  | 0.541 | G | A | 8.2E-07 | -0.047 | 0.022 | Total hip area       | Adult height | .       | intergenic |
| rs9456307  | chr6  | 158508410 | 0.954 | T | A | 4.5E-05 | 0.093  | 0.057 | Total hip area       | Adult height | TULP4   | 3'UTR      |
| rs10748128 | chr12 | 69433878  | 0.385 | T | G | 2.4E-09 | 0.056  | 0.038 | Femoral neck area    | Adult height | .       | intergenic |
| rs10859567 | chr12 | 93733149  | 0.543 | T | G | 1.9E-05 | 0.039  | 0.037 | Femoral neck area    | Adult height | CRADD   | intron     |
| rs11049611 | chr12 | 28447311  | 0.694 | C | T | 1.4E-07 | -0.053 | 0.039 | Femoral neck area    | Adult height | CCDC91  | intron     |
| rs143384   | chr20 | 35437976  | 0.370 | G | A | 2.5E-06 | 0.045  | 0.080 | Femoral neck area    | Adult height | GDF5    | 5'UTR      |
| rs2338115  | chr17 | 38773325  | 0.523 | T | C | 1.6E-05 | 0.040  | 0.024 | Femoral neck area    | Adult height | PIP4K2B | intron     |
| rs3118905  | chr13 | 50531198  | 0.760 | G | A | 8.8E-06 | 0.048  | 0.060 | Femoral neck area    | Adult height | .       | intergenic |
| rs4240326  | chr4  | 144918112 | 0.476 | A | G | 6.3E-06 | 0.042  | 0.043 | Femoral neck area    | Adult height | .       | intergenic |
| rs6845999  | chr4  | 144644674 | 0.431 | T | C | 1.8E-10 | 0.059  | 0.053 | Femoral neck area    | Adult height | HHIP    | upstream   |
| rs763318   | chr4  | 12961950  | 0.541 | G | A | 3.1E-05 | -0.038 | 0.022 | Femoral neck area    | Adult height | .       | intergenic |
| rs10083886 | chr17 | 71927214  | 0.210 | T | C | 1.6E-05 | -0.049 | 0.018 | Intertrochanter area | Adult height | .       | intergenic |
| rs143384   | chr20 | 35437976  | 0.370 | G | A | 1.1E-07 | 0.051  | 0.080 | Intertrochanter area | Adult height | GDF5    | 5'UTR      |
| rs6879260  | chr5  | 180304014 | 0.589 | C | T | 1.8E-06 | 0.045  | 0.026 | Intertrochanter area | Adult height | GFPT2   | intron     |
| rs10748128 | chr12 | 69433878  | 0.385 | T | G | 1.9E-07 | 0.050  | 0.038 | Trochanter area      | Adult height | .       | intergenic |
| rs10877030 | chr12 | 57862931  | 0.648 | T | G | 1.4E-09 | 0.059  | 0.025 | Trochanter area      | Adult height | .       | intergenic |
| rs11049611 | chr12 | 28447311  | 0.694 | C | T | 6.2E-05 | -0.041 | 0.039 | Trochanter area      | Adult height | CCDC91  | intron     |

|             |       |           |       |   |   |         |        |       |                 |              |          |             |
|-------------|-------|-----------|-------|---|---|---------|--------|-------|-----------------|--------------|----------|-------------|
| rs143384    | chr20 | 35437976  | 0.370 | G | A | 6.7E-18 | 0.083  | 0.080 | Trochanter area | Adult height | GDF5     | 5'UTR       |
| rs1582931   | chr5  | 123321505 | 0.518 | G | A | 1.1E-05 | -0.041 | 0.029 | Trochanter area | Adult height | .        | intergenic  |
| rs2425163   | chr20 | 35844748  | 0.158 | G | A | 4.5E-05 | 0.052  | 0.061 | Trochanter area | Adult height | PHF20    | intron      |
| rs7517682   | chr1  | 103054033 | 0.449 | G | A | 1.7E-05 | 0.040  | 0.025 | Trochanter area | Adult height | COL11A1  | intron      |
| rs763318    | chr4  | 12961950  | 0.541 | G | A | 7.1E-08 | -0.050 | 0.022 | Trochanter area | Adult height | .        | intergenic  |
| rs7692995   | chr4  | 17935011  | 0.897 | T | C | 3.8E-05 | 0.063  | 0.075 | Trochanter area | Adult height | LCORL    | intron      |
| rs115242848 | chr2  | 118750031 | 0.012 | T | C | 3.4E-04 | 0.154  | 0.280 | Spine area      | Spine BMD    | EN1      | intergenic  |
| rs11755164  | chr6  | 44671447  | 0.643 | C | T | 9.3E-06 | 0.044  | 0.024 | Spine area      | Spine BMD    | .        | intergenic  |
| rs2062377   | chr8  | 118995181 | 0.451 | T | A | 2.9E-04 | 0.034  | 0.081 | Spine area      | Spine BMD    | .        | intergenic  |
| rs227584    | chr17 | 44148179  | 0.273 | C | A | 5.6E-04 | -0.037 | 0.043 | Spine area      | Spine BMD    | C17orf53 | p.Thr126Pro |
| rs3801387   | chr7  | 121334711 | 0.221 | G | A | 1.5E-06 | 0.054  | 0.073 | Spine area      | Spine BMD    | WNT16    | intron      |
| rs4233949   | chr2  | 54432570  | 0.354 | C | G | 2.8E-04 | 0.036  | 0.055 | Spine area      | Spine BMD    | .        | intergenic  |
| rs577721086 | chr6  | 127118902 | 0.073 | C | T | 5.5E-04 | 0.063  | 0.023 | Spine area      | Spine BMD    | RSPO3    | upstream    |
| rs6532023   | chr4  | 87852697  | 0.295 | T | G | 4.6E-04 | 0.036  | 0.048 | Spine area      | Spine BMD    | .        | intergenic  |
| rs736825    | chr12 | 54023792  | 0.603 | C | G | 1.0E-14 | 0.074  | 0.062 | Spine area      | Spine BMD    | HOXC6    | upstream    |
| rs7521902   | chr1  | 22164231  | 0.720 | C | A | 4.3E-04 | -0.037 | 0.034 | Spine area      | Spine BMD    | .        | intergenic  |
| rs11755164  | chr6  | 44671447  | 0.643 | C | T | 6.7E-06 | 0.043  | 0.013 | Total hip area  | Hip BMD      | .        | intergenic  |
| rs13245690  | chr7  | 121145010 | 0.624 | A | G | 1.2E-04 | 0.036  | 0.023 | Total hip area  | Hip BMD      | CPED1    | intron      |
| rs163879    | chr11 | 30930127  | 0.286 | C | T | 8.2E-05 | -0.041 | 0.018 | Total hip area  | Hip BMD      | DCDC5    | intron      |
| rs7217932   | chr17 | 71952875  | 0.440 | A | G | 8.7E-12 | -0.064 | 0.033 | Total hip area  | Hip BMD      | .        | intergenic  |
| rs7217932   | chr17 | 71952875  | 0.440 | A | G | 1.2E-05 | -0.042 | 0.033 | Total hip area  | Hip BMD      | .        | intergenic  |
| rs7521902   | chr1  | 22164231  | 0.720 | C | A | 4.4E-05 | -0.043 | 0.037 | Total hip area  | Hip BMD      | .        | intergenic  |

Results are shown for markers that are significant after correcting for multiple testing (Bonferroni  $P < 7.2E-5$  for height, and  $< 0.00071$  for BMD). The allele used of each variant is the one that has a positive effect on adult height or positive effect on BMD. Chromosomal location is according to build38. Effect refers to the area phenotype. Prior effect refers to the effect on height or on BMD. Prior phenotype is either height or weight. EA is the effect allele, EAF the effect allele frequency, and OA the other allele.

Supplementary Table 8. Mendelian Randomization

| Outcome | Exposure          | Method          | Estimate | Std Error | 95% CI        | P-value |
|---------|-------------------|-----------------|----------|-----------|---------------|---------|
| FN BMD  | Total hip area    | Simple median   | 0.164    | 0.057     | 0.053,0.275   | 0.004   |
|         |                   | Weighted median | 0.127    | 0.051     | 0.028,0.226   | 0.012   |
|         |                   | IVW             | 0.178    | 0.045     | 0.091,0.266   | 0.000   |
|         |                   | MR-Egger        | 0.059    | 0.105     | -0.148,0.265  | 0.577   |
|         |                   | (intercept)     | 0.006    | 0.005     | -0.003,0.015  | 0.210   |
|         | Inter area        | Simple median   | 0.184    | 0.054     | 0.078,0.290   | 0.001   |
|         |                   | Weighted median | 0.112    | 0.049     | 0.015,0.209   | 0.023   |
|         |                   | IVW             | 0.179    | 0.046     | 0.089,0.270   | 0.000   |
|         |                   | MR-Egger        | 0.006    | 0.107     | -0.204,0.216  | 0.955   |
|         |                   | (intercept)     | 0.008    | 0.005     | -0.001,0.017  | 0.074   |
|         | Trochanter area   | Simple median   | 0.018    | 0.054     | -0.088,0.124  | 0.740   |
|         |                   | Weighted median | 0.000    | 0.050     | -0.097,0.097  | 1,000   |
|         |                   | IVW             | 0.031    | 0.039     | -0.045,0.108  | 0.424   |
|         |                   | MR-Egger        | 0.035    | 0.093     | -0.147,0.217  | 0.707   |
|         |                   | (intercept)     | 0.000    | 0.004     | -0.008,0.008  | 0.965   |
|         | Femoral neck area | Simple median   | 0.029    | 0.053     | -0.076,0.133  | 0.589   |
|         |                   | Weighted median | 0.084    | 0.049     | -0.012,0.181  | 0.088   |
|         |                   | IVW             | 0.058    | 0.046     | -0.033,0.148  | 0.212   |
|         |                   | MR-Egger        | 0.249    | 0.107     | 0.040,0.459   | 0.019   |
|         |                   | (intercept)     | -0.009   | 0.005     | -0.018,0.000  | 0.047   |
| LS BMD  | Lumbar spine area | Simple median   | -0.337   | 0.049     | -0.433,-0.241 | 0.000   |
|         |                   | Weighted median | -0.324   | 0.044     | -0.411,-0.237 | 0.000   |
|         |                   | IVW             | -0.234   | 0.052     | -0.337,-0.132 | 0.000   |
|         |                   | MR-Egger        | -0.307   | 0.107     | -0.518,-0.097 | 0.004   |
|         |                   | (intercept)     | 0.004    | 0.005     | -0.006,0.015  | 0.435   |
| Height  | Total hip area    | Simple median   | -0.043   | 0.025     | -0.093,0.006  | 0.086   |
|         |                   | Weighted median | -0.032   | 0.025     | -0.082,0.017  | 0.200   |

|                   |                 |        |       |               |       |
|-------------------|-----------------|--------|-------|---------------|-------|
|                   | IVW             | -0.037 | 0.021 | -0.078,0.005  | 0.085 |
|                   | MR-Egger        | -0.065 | 0.052 | -0.167,0.037  | 0.210 |
|                   | (intercept)     | 0.001  | 0.002 | -0.002,0.004  | 0.549 |
| Inter area        | Simple median   | -0.021 | 0.024 | -0.069,0.026  | 0.380 |
|                   | Weighted median | 0.000  | 0.024 | -0.047,0.047  | 1,000 |
|                   | IVW             | -0.020 | 0.019 | -0.057,0.016  | 0.276 |
|                   | MR-Egger        | -0.047 | 0.045 | -0.136,0.041  | 0.296 |
|                   | (intercept)     | 0.001  | 0.001 | -0.002,0.004  | 0.512 |
| Trochanter area   | Simple median   | -0.045 | 0.024 | -0.091,0.002  | 0.060 |
|                   | Weighted median | -0.030 | 0.024 | -0.077,0.018  | 0.225 |
|                   | IVW             | -0.044 | 0.020 | -0.083,-0.006 | 0.024 |
|                   | MR-Egger        | -0.052 | 0.048 | -0.146,0.042  | 0.279 |
|                   | (intercept)     | 0.000  | 0.001 | -0.003,0.003  | 0.863 |
| Femoral neck area | Simple median   | 0.022  | 0.023 | -0.024,0.068  | 0.353 |
|                   | Weighted median | 0.000  | 0.024 | -0.047,0.047  | 1,000 |
|                   | IVW             | 0.004  | 0.019 | -0.033,0.041  | 0.838 |
|                   | MR-Egger        | -0.012 | 0.046 | -0.102,0.079  | 0.803 |
|                   | (intercept)     | 0.000  | 0.001 | -0.002,0.003  | 0.714 |
| Lumbar spine area | Simple median   | -0.057 | 0.024 | -0.105,-0.009 | 0.019 |
|                   | Weighted median | -0.078 | 0.025 | -0.127,-0.028 | 0.002 |
|                   | IVW             | -0.069 | 0.023 | -0.113,-0.025 | 0.002 |
|                   | MR-Egger        | -0.102 | 0.055 | -0.209,0.006  | 0.064 |
|                   | (intercept)     | 0.001  | 0.002 | -0.002,0.004  | 0.510 |

Causal relationships between DXA bone area and height and BMD were estimated with a two sample Mendelian Randomization, using GIANT and GEFOS effect estimates for height and BMD respectively, as instrumental variables. The Mendelian randomization was performed with the MendelianRandomization package in R<sup>12</sup>. FN is femoral neck, LS is lumbar spine, and Inter refers to intertrochanter.

Supplementary Table 9. Genetic correlations between DXA area, DXA BMD, hip or knee osteoarthritis and hip fractures

|                          |              |              | $r_g$  | se    | P value | Combined |              |         |
|--------------------------|--------------|--------------|--------|-------|---------|----------|--------------|---------|
|                          |              |              |        |       |         | $r_g$    | 95% CI       | P value |
| <b>LS area vs. Other</b> | LS area      | LS BMD       | 0.35   | 0.10  | 9.0E-04 | 0.30     | 0.13, 0.46   | 4.8E-04 |
|                          | LS BMD       | LS area      | 0.20   | 0.15  | 0.17    |          |              |         |
|                          | LS area      | FN BMD       | 0.18   | 0.12  | 0.13    | 0.26     | 0.064, 0.45  | 9.1E-03 |
|                          | FN BMD       | LS area      | 0.41   | 0.17  | 0.016   |          |              |         |
|                          | LS area      | Inter BMD    | 0.20   | 0.11  | 0.063   | 0.22     | 0.054, 0.39  | 9.8E-03 |
|                          | Inter BMD    | LS area      | 0.26   | 0.14  | 0.069   |          |              |         |
|                          | LS area      | Troch BMD    | 0.16   | 0.10  | 0.11    | 0.23     | 0.063, 0.39  | 6.8E-03 |
|                          | Troch BMD    | LS area      | 0.37   | 0.15  | 0.014   |          |              |         |
|                          | LS area      | Height       | 0.056  | 0.038 | 0.15    | 0.064    | -0.008, 0.14 | 0.082   |
|                          | Height       | LS area      | 0.16   | 0.13  | 0.22    |          |              |         |
|                          | LS area      | Hip OA       | 0.076  | 0.077 | 0.32    | 0.043    | -0.10, 0.19  | 0.55    |
|                          | Hip OA       | LS area      | -0.28  | 0.24  | 0.25    |          |              |         |
| <b>BMD vs BMD</b>        | LS area      | Knee OA      | -0.040 | 0.059 | 0.50    | -        | -0.15, 0.078 | 0.55    |
|                          | Knee OA      | LS area      | 0.089  | 0.26  | 0.74    |          |              |         |
|                          | LS area      | Hip fracture | 0.27   | 0.14  | 0.064   | 0.22     | -0.045, 0.48 | 0.11    |
|                          | Hip fracture | LS area      | -0.094 | 0.36  | 0.80    |          |              |         |
|                          | LS BMD       | FN BMD       | 0.67   | 0.14  | 8.9E-07 | 0.67     | 0.49, 0.85   | 1.4E-13 |
|                          | FN BMD       | LS BMD       | 0.68   | 0.12  | 3.1E-08 |          |              |         |
|                          | LS BMD       | Inter BMD    | 0.68   | 0.12  | 4.6E-08 | 0.68     | 0.52, 0.85   | 6.9E-16 |
|                          | Inter BMD    | LS BMD       | 0.68   | 0.12  | 2.9E-09 |          |              |         |
|                          | LS BMD       | Troch BMD    | 0.60   | 0.13  | 7.8E-06 | 0.69     | 0.52, 0.87   | 1.9E-14 |
|                          | Troch BMD    | LS BMD       | 0.77   | 0.12  | 3.4E-10 |          |              |         |
|                          | FN BMD       | Inter BMD    | 0.98   | 0.15  | 1.7E-10 | 0.97     | 0.77, 1.18   | 6.4E-20 |
|                          | Inter BMD    | FN BMD       | 0.97   | 0.15  | 6.4E-11 |          |              |         |
|                          | FN BMD       | Troch BMD    | 0.92   | 0.17  | 1.2E-07 | 0.95     | 0.73, 1.17   | 4.0E-17 |
|                          | Troch BMD    | FN BMD       | 0.96   | 0.15  | 6.3E-11 |          |              |         |



|                                  |                |              |        |       |         |       |              |         |
|----------------------------------|----------------|--------------|--------|-------|---------|-------|--------------|---------|
|                                  | Troch BMD      | Inter BMD    | 0.98   | 0.14  | 1.4E-11 |       |              |         |
|                                  | Inter BMD      | Troch BMD    | 0.95   | 0.17  | 5.6E-08 | 0.97  | 0.75, 1.18   | 4.3E-18 |
| <b>Hip area vs. Other</b>        | Hip total area | LS area      | 0.47   | 0.15  | 2.4E-03 |       |              |         |
|                                  | Hip total area | Height       | 0.12   | 0.037 | 1.7E-03 |       |              |         |
|                                  | Hip total area | Hip OA       | 0.18   | 0.073 | 0.013   |       |              |         |
|                                  | Hip total area | Knee OA      | -0.010 | 0.057 | 0.86    |       |              |         |
|                                  | Hip total area | Hip fracture | 0.24   | 0.14  | 0.085   |       |              |         |
|                                  | Hip FN area    | LS area      | 0.43   | 0.21  | 0.035   |       |              |         |
|                                  | Hip FN area    | Hip FN BMD   | -0.15  | 0.16  | 0.36    |       |              |         |
|                                  | Hip FN area    | Height       | 0.14   | 0.045 | 2.7E-03 |       |              |         |
|                                  | Hip FN area    | Hip OA       | 0.11   | 0.086 | 0.19    |       |              |         |
|                                  | Hip FN area    | Knee OA      | -0.026 | 0.075 | 0.73    |       |              |         |
|                                  | Hip FN area    | Hip fracture | 0.76   | 0.28  | 6.6E-03 |       |              |         |
|                                  | Inter area     | LS area      | 0.26   | 0.15  | 0.097   |       |              |         |
|                                  | Inter area     | Inter BMD    | -0.43  | 0.14  | 1.8E-03 |       |              |         |
|                                  | Inter area     | Height       | 0.093  | 0.036 | 9.7E-03 |       |              |         |
|                                  | Inter area     | Hip OA       | 0.18   | 0.074 | 0.019   |       |              |         |
|                                  | Inter area     | Knee OA      | -0.020 | 0.056 | 0.72    |       |              |         |
|                                  | Inter area     | Hip fracture | 0.15   | 0.13  | 0.25    |       |              |         |
|                                  | Troch area     | LS area      | 0.64   | 0.20  | 1.6E-03 |       |              |         |
|                                  | Troch area     | Troch BMD    | 0.031  | 0.12  | 0.80    |       |              |         |
|                                  | Troch area     | Height       | 0.089  | 0.039 | 0.023   |       |              |         |
|                                  | Troch area     | Hip OA       | 0.12   | 0.079 | 0.14    |       |              |         |
|                                  | Troch area     | Knee OA      | 0.021  | 0.063 | 0.74    |       |              |         |
|                                  | Troch area     | Hip fracture | 0.14   | 0.15  | 0.33    |       |              |         |
| <b>Hip BMD vs. hip fractures</b> | Hip fracture   | FN BMD       | -0.59  | 0.24  | 0.014   | -0.57 | -0.86, -0.28 | 9.8E-05 |
|                                  | FN BMD         | Hip fracture | -0.56  | 0.19  | 2.5E-03 |       |              |         |
|                                  | Hip fracture   | Inter BMD    | -0.63  | 0.22  | 3.9E-03 | -0.52 | -0.79, -0.25 | 1.8E-04 |
|                                  | Inter BMD      | Hip fracture | -0.45  | 0.18  | 0.013   |       |              |         |
|                                  | Hip fracture   | Troch BMD    | -0.64  | 0.23  | 5.5E-03 | -0.44 | -0.69, -0.18 | 7.4E-04 |
|                                  | Troch BMD      | Hip fracture | -0.35  | 0.16  | 0.029   |       |              |         |

---

We estimated the genetic correlation between the traits indicated using cross-trait LD score regression on the GWAS summary statistics from Iceland and UK Biobank (Methods).  $r_g$  is the genetic correlation coefficient,  $se$  is standard error, and  $CI$  confidence interval. LS is lumbar spine, FN is Femoral neck, Inter is intertrochanteric, Troch is trochanteric, OA is osteoarthritis. Hip area measures and total hip BMD are not available in the UK Biobank dataset.

---

Supplementary Table 10. Contribution of DXA area, BMC and BMD to the risk of hip fractures, full model

| Phenotype      | OR   | 95% CI     | P value |
|----------------|------|------------|---------|
| LS_Area        | 0.97 | 0.95, 0.99 | 0.0063  |
| LS_BMC         | 1.06 | 1.01, 1.11 | 0.027   |
| LS_BMD         | 0.97 | 0.94, 1.01 | 0.16    |
| Hip_Inter_Area | 1.10 | 1.07, 1.13 | 2.9E-14 |
| Hip_FN_Area    | 1.01 | 1.00, 1.01 | 4.9E-05 |
| Hip_Troch_Area | 1.04 | 1.03, 1.05 | 3.0E-19 |
| Hip_BMC        | 0.83 | 0.79, 0.87 | 5.8E-14 |
| Hip_FN_BMD     | 1.01 | 1.00, 1.02 | 0.013   |
| Hip_Inter_BMD  | 1.09 | 1.06, 1.12 | 2.8E-08 |
| Hip_Troch_BMD  | 1.04 | 1.02, 1.05 | 2.2E-08 |

We performed a multivariable logistic regression for hip fractures, using age, height and sex adjusted measurements of DXA area, BMD and BMC of lumbar spine, as well as area and BMD of femoral neck, intertrochanteric and trochanteric and BMC of the total hip as explanatory variables. Each of these phenotypes showed independent association with hip fractures, adjusting for all the other phenotypes, according to likelihood ratio test (see model output below). LS is lumbar spine, Inter is intertrochanteric, Troch in trochanter, FN is femoral neck, BMC is bone mineral content, BMD is bone mineral density, CI is confidence interval, OR is odds ratio.

\*\*\* model output.

Single term deletions

Model: hip\_fractures ~ LS\_area + hip\_inter\_area + hip\_fn\_area + hip\_troch\_area + LS\_bmc + LS\_bmd + hip\_bmc + hip\_fn\_bmd + hip\_inter\_bmd + hip\_troch\_bmd

## Supplementary References:

1. Gu, S. *et al.* Thermodynamic stability of small hairpin RNAs highly influences the loading process of different mammalian Argonautes. *Proceedings of the National Academy of Sciences of the United States of America* **108**, 9208-9213 (2011).
2. Acevedo, R., Orench-Rivera, N., Quarles, K.A. & Showalter, S.A. Helical Defects in MicroRNA Influence Protein Binding by TAR RNA Binding Protein. *PLoS ONE* **10**, e0116749 (2015).
3. Connerty, P., Ahadi, A. & Hutvagner, G. RNA Binding Proteins in the miRNA Pathway. *International Journal of Molecular Sciences* **17**, 31 (2016).
4. Karabegović, I. *et al.* Genetic Polymorphism of miR-196a-2 is Associated with Bone Mineral Density (BMD). *International Journal of Molecular Sciences* **18**, 2529 (2017).
5. Bray, N.L., Pimentel, H., Melsted, P. & Pachter, L. Near-optimal probabilistic RNA-seq quantification. *Nature Biotechnology* **34**, 525 (2016).
6. Love, M.I., Huber, W. & Anders, S. Moderated estimation of fold change and dispersion for RNA-seq data with DESeq2. *Genome Biology* **15**, 550 (2014).
7. Karagkouni, D. *et al.* DIANA-TarBase v8: a decade-long collection of experimentally supported miRNA–gene interactions. *Nucleic Acids Research* **46**, D239-D245 (2018).
8. Liberzon, A. *et al.* The Molecular Signatures Database Hallmark Gene Set Collection. *Cell Systems* **1**, 417-425 (2015).
9. Pruim, R.J. *et al.* LocusZoom: regional visualization of genome-wide association scan results. *Bioinformatics* **26**, 2336-2337 (2010).
10. Wood, A.R. *et al.* Defining the role of common variation in the genomic and biological architecture of adult human height. *Nat Genet* **46**, 1173-1186 (2014).
11. Zheng, H.-F. *et al.* Whole-genome sequencing identifies EN1 as a determinant of bone density and fracture. *Nature* **526**, 112-117 (2015).
12. Bowden, J., Davey Smith, G. & Burgess, S. Mendelian randomization with invalid instruments: effect estimation and bias detection through Egger regression. *International Journal of Epidemiology* **44**, 512-525 (2015).
